# Supplementary material for: Simple and novel synthesis of 3-(thio)phosphoryl-β-lactams by radical cyclization
Source: Royal Society of Chemistry journal article supplement (doi:10.1039/c3nj00192j), 2013-01-01

## A simply and novel synthesis of 3-(thio)phosphoryl- $\beta$ -lactams by radical cyclization

Paweł Punda, Sławomir Makowiec\*

Department of Organic Chemistry, Faculty of Chemistry, Gdańsk University of Technology,  
Narutowicza 11/12, 80-233 Gdańsk, Poland

Fax: +48 58 3472694 E-mail: mak@pg.gda.pl

### Table of contents

|                                                            |     |
|------------------------------------------------------------|-----|
| General Information                                        | S2  |
| General procedure for synthesis of phosphonoacetatenamides | S2  |
| NMR data for compound <b>3a</b>                            | S2  |
| NMR data for compound <b>3b</b>                            | S3  |
| NMR data for compound <b>3c</b>                            | S3  |
| NMR data for compound <b>3e</b>                            | S3  |
| Synthesis and NMR data for <b>3f</b>                       | S3  |
| General procedure for synthesis of <b>4</b>                | S4  |
| NMR and HRMS data for compound <b>4a</b>                   | S4  |
| NMR and HRMS data for compound <b>4b</b>                   | S4  |
| NMR and HRMS data for compound <b>4c</b>                   | S5  |
| NMR and HRMS data for compound <b>4f</b>                   | S5  |
| NMR and HRMS data for compound <b>5f</b>                   | S5  |
| Synthesis of <b>6a</b>                                     | S6  |
| NMR and HRMS data for compound <b>6a</b>                   | S6  |
| <sup>1</sup> H NMR spectra of compound <b>3a</b>           | S7  |
| <sup>13</sup> C NMR spectra of compound <b>3a</b>          | S8  |
| <sup>1</sup> H NMR spectra of compound <b>3b</b>           | S9  |
| <sup>1</sup> H NMR spectra of compound <b>3c</b>           | S10 |
| <sup>13</sup> C NMR spectra of compound <b>3c</b>          | S11 |
| <sup>1</sup> H NMR spectra of compound <b>3e</b>           | S12 |
| <sup>1</sup> H NMR spectra of compound <b>3f</b>           | S13 |
| <sup>13</sup> C NMR spectra of compound <b>3f</b>          | S14 |
| <sup>31</sup> P NMR spectra of compound <b>3f</b>          | S15 |
| <sup>1</sup> H NMR spectra of compound <b>4a</b>           | S16 |
| <sup>13</sup> C NMR spectra of compound <b>4a</b>          | S17 |
| <sup>1</sup> H NMR spectra of compound <b>4b</b>           | S18 |
| <sup>13</sup> C NMR spectra of compound <b>4b</b>          | S19 |
| <sup>1</sup> H NMR spectra of compound <b>4c</b>           | S20 |
| <sup>13</sup> C NMR spectra of compound <b>4c</b>          | S21 |
| <sup>1</sup> H NMR spectra of compound <b>4f</b>           | S22 |
| <sup>13</sup> C NMR spectra of compound <b>4f</b>          | S23 |
| <sup>31</sup> P NMR spectra of compound <b>4f</b>          | S24 |
| <sup>1</sup> H NMR spectra of compound <b>5f</b>           | S25 |
| <sup>13</sup> C NMR spectra of compound <b>5f</b>          | S26 |
| <sup>31</sup> P NMR spectra of compound <b>5f</b>          | S27 |
| <sup>1</sup> H NMR spectra of compound <b>6a</b>           | S28 |

## 1. General Information

Reagents were purchased from Sigma-Aldrich. Toluene were distilled from potassium under argon. Analytical TLC was performed on aluminum sheets of silica gel UV-254 Merck. Flash chromatography was performed using 40-63 microns of Zeochem silica gel. The  $^1\text{H}$ ,  $^{13}\text{C}$  were recorded on Varian Gemini 200 and Varian Unity Plus 500, chemical shifts ( $\delta$ ) in ppm rel. to internal  $\text{Me}_4\text{Si}$ ; coupling constants  $J$  in Hz. High-resolution (HRMS) was recorded on *MicroMas Quattro LCT* mass spectrometer. Melting points were determined with *Warsztat Elektromechaniczny W-wa* apparatus and are not corrected.

## 2. General procedure for synthesis of phosphonoacetatenamides (3)

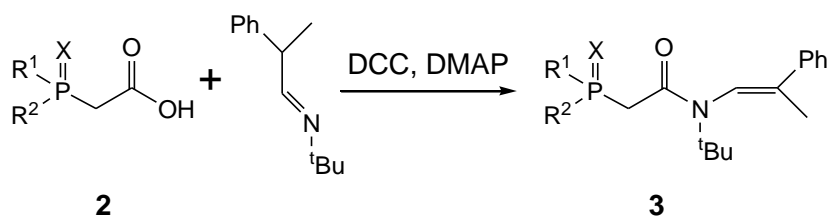

A solution of phosphonoacetic acid (2) (1 mmol) and tert-Butyl-(2-phenyl-propylidene)-amine (1 mmol, 0.189 g) in DMF 5 mL was stirred and cooled to 0°C. DCC (1 mmol, 0.206g) and DMAP (1mmol, 0.122g) was added. The reaction mixture was stirred for 3 days. DMF was removed under reduced pressure. Residue was dissolved in EtOAc 30 mL and DCU was filtered off. Organic layer was washed with 1 M HCl (10 mL), sat. aq NaHCO<sub>3</sub> (10 mL) and dried (MgSO<sub>4</sub>). The residue was a subject to purification as specified below.

### **{[tert-Butyl-(2-phenyl-propenyl)-carbamoyl]-methyl}-phosphonic acid diethyl ester (3a)**

Purification by flash column chromatography, (AcOEt/Hex, 1:2),  $^1\text{H}$  NMR (200 MHz, CDCl<sub>3</sub>):  $\delta$  1.25-1.33 (m, 6 H), 1.45 (s, 9 H), 2.02 (s, 3 H), 2.87 (dd, 1 H,  $J = 22.7$  Hz,  $J = 22.3$  Hz), 3.25 (dd, 1 H,  $J = 22.3$  Hz,  $J = 21.1$  Hz), 4.07-4.18 (m, 4 H), 6.48 (s, 1 H), 7.32-7.45 (m, 5 H).  $^{13}\text{C}$  NMR (50 MHz, CDCl<sub>3</sub>):  $\delta$  16.1, 16.7 (d,  $J = 2.9$  Hz), 16.8 (d,  $J = 2.9$  Hz), 28.9, 36.4 (d,  $J = 133.8$  Hz), 59.8, 62.6 (d,  $J = 6.3$  Hz), 62.8 (d,  $J = 6.4$  Hz), 126.5, 127.8, 128.6, 129.0, 139.1, 140.1, 165.7 (d,  $J = 5.2$  Hz).

**N-tert-Butyl-2-(5,5-dimethyl-2-oxo-2 $\lambda^5$ -[1,3,2]dioxaphosphinan-2-yl)-N-(2-phenyl-propenyl)-acetamide (3b)**

Purification by flash column chromatography, (AcOEt/Hex, 4:1),  $^1\text{H}$  NMR (200 MHz,  $\text{CDCl}_3$ ):  $\delta$  1.02 (s, 3 H), 1.13 (s, 3 H), 1.46 (s, 9 H), 2.04 (d, 3 H,  $J = 1.4$  Hz), 2.95 (dd,  $J = 21.7$  Hz,  $J = 21.7$  Hz), 3.34 (dd,  $J = 21.7$  Hz,  $J = 21.7$  Hz), 4.05-4.18 (m, 4 H), 6.48 (s, 1 H), 7.31-7.49 (m, 5 H).

**{[tert-Butyl-(2-phenyl-propenyl)-carbamoyl]-methyl}-phenyl-phosphinic acid methyl ester (mixture of Z/E isomers) (3c)**

Purification by flash column chromatography, (AcOEt/Hex, 1:1),  $^1\text{H}$  NMR (500 MHz,  $\text{CDCl}_3$ ):  $\delta$  1.31 (s, 5 H), 1.41 (s, 4 H), 1.94 (d, 1.4 H,  $J = 1.4$  Hz), 1.98 (d, 1.6 H,  $J = 1.4$  Hz), 2.93-3.04 (m, 1 H), 3.37-3.50 (m, 1 H), 3.70 (d, 1.4 H,  $J = 11.2$  Hz), 3.74 (d, 1.6 H,  $J = 11.2$  Hz), 5.92 (s, 0.55 H), 6.41 (s, 0.45 H), 7.31-7.41 (m, 4 H), 7.41-7.46 (m, 3 H), 7.51-7.56 (m, 1 H), 7.77-7.81 (m, 2 H).  $^{13}\text{C}$  NMR (50 MHz,  $\text{CDCl}_3$ ):  $\delta$  16.0 (min), 16.1 (maj), 28.7 (maj), 28.8 (min), 39.6 (d,  $J = 89.4$  Hz, maj), 40.4 (d,  $J = 91.1$  Hz, min), 52.0 (d,  $J = 4.4$  Hz, maj), 52.1 (d,  $J = 4.3$  Hz, min), 59.8 (maj), 59.9 (min), 126.4 (maj), 126.5 (min), 127.5 (maj), 127.8 (min), 128.6 (min), 128.8 (maj), 129.0 (maj), 129.1 (min), 132.2, 132.4 (maj), 132.6 (min), 132.8 (maj), 132.9 (min), 133.0 (maj), 133.1 (min), 139.0 (maj), 139.1 (min), 139.8 (maj), 140.0 (min), 165.6 (d,  $J = 5.4$  Hz).

**N-tert-Butyl-2-(dibutyl-phosphinoyl)-N-(2-phenyl-propenyl)-acetamide (3e)**

Purification by flash column chromatography, (AcOEt/Hex, 2:3),  $^1\text{H}$  NMR (200 MHz,  $\text{CDCl}_3$ ):  $\delta$  0.90 (t, 6 H,  $J = 6.96$  Hz), 1.25-1.41 (m, 4 H), 1.51-1.63 (m, 4 H), 1.71-1.82 (m, 4 H), 2.08 (s, 3 H), 4.36-4.50 (m, 2 H), 6.25 (s, 1 H), 7.33-7.40 (m, 5 H).

**3. Synthesis of {[tert-Butyl-(2-phenyl-propenyl)-carbamoyl]-methyl}-phosphonothioic acid O,O-diethyl ester (3f)**

A solution of (diethoxy-thiophosphoryl)-acetic acid (**2f**) (1 mmol, 0.212g) and tert-Butyl-(2-phenyl-propylidene)-amine (1 mmol, 0.189 g) in DMF 5 mL was stirred and cooled to 0°C. DCC (1 mmol, 0.206g) and DMAP (1mmol, 0.122g) was added. The reaction mixture was stirred for 3 days. DMF was removed under reduced pressure. Residue was dissolved in EtOAc 30 mL and DCU was filtered off. Organic layer was washed with 1 M HCl (10 mL), sat. aq  $\text{NaHCO}_3$  (10 mL) and dried ( $\text{MgSO}_4$ ). The residue was a subject to purification by flash column chromatography, (AcOEt/Hex, 1:8)  $^1\text{H}$  NMR (500 MHz,  $\text{CDCl}_3$ ):  $\delta$  1.27 (t, 3 H,

$J = 6.8$  Hz), 1.31 (t, 3 H,  $J = 6.8$  Hz), 1.47 (s, 9 H), 2.02 (d, 3 H,  $J = 1$  Hz), 2.99 (dd, 1 H,  $J = 21.9$  Hz,  $J = 21.9$  Hz), 3.53 (dd, 1 H,  $J = 17.1$  Hz,  $J = 17.6$  Hz), 4.06-4.22 (m, 4 H), 6.55 (s, 1 H), 7.31-7.39 (m, 3 H), 7.45-7.47 (m, 2 H).  $^{13}\text{C}$  NMR (50 MHz,  $\text{CDCl}_3$ ):  $\delta$  16.2, 16.5 (d,  $J = 6.6$  Hz), 16.7 (d,  $J = 6.5$  Hz), 28.9, 44.1 (d,  $J = 103.3$  Hz), 59.9, 62.9 (d,  $J = 6.4$  Hz), 63.8 (d,  $J = 6.5$  Hz), 126.6, 128.2, 128.6, 129.0, 138.7, 140.2, 165.6.  $^{31}\text{P}$  NMR (200 MHz,  $\text{CDCl}_3$ ):  $\delta$  88.5.

#### 4. General procedure for synthesis of 3-phosphoryl $\beta$ -lactams and 3-thiophosphoryl $\beta$ -lactams (4)

To a stirred mixture of **3** (1 mmol) in acetic acid (10 mL) at reflux, was added  $\text{Mn}(\text{OAc})_3 \cdot 2\text{H}_2\text{O}$  (2 mmol, 0.535 g). After 10 min., reaction mixture was cooled and poured into 50 mL of ice water, and extracted with  $\text{CH}_2\text{Cl}_2$  (5x20 mL). Organic layer was washed with aqueous 5 %  $\text{NaHCO}_3$  (3x10 mL), dried with  $\text{MgSO}_4$  and concentrated. The residue was a subject to purification as specified below.

##### 1-tert-butyl-2-oxo-4-(1-phenylvinyl)azetidin-3-ylphosphonate (4a)

Purification by flash column chromatography, ( $\text{AcOEt}/\text{Hex}$ , 1:1), yield 50%.  $^1\text{H}$  NMR (200 MHz,  $\text{CDCl}_3$ ):  $\delta$  (ppm) 1.24 (3 H, t,  $J = 6.9$  Hz), 1.30 (3 H, t,  $J = 6.9$  Hz), 1.38 (9 H, s), 3.23 (1 H, dd,  $J^{PH} = 13.9$  Hz,  $J^{HH} = 2.4$  Hz), 4.04-4.23 (4 H, m), 4.66 (1 H, dd,  $J^{PH} = 9.2$  Hz,  $J^{HH} = 2.4$  Hz), 5.51 (1 H, s), 5.59 (1 H, s), 7.33-7.49 (5 H, m).  $^{13}\text{C}$  NMR (50 MHz,  $\text{CDCl}_3$ ):  $\delta$  (ppm) 16.7 (d,  $J^2 = 3.1$  Hz), 16.8 (d,  $J^2 = 3.2$  Hz), 28.3, 54.2 (d,  $J^1 = 29.3$  Hz), 55.8 (d,  $J^2 = 2.2$  Hz), 56.7, 62.8 (d,  $J^2 = 6.5$  Hz), 63.2 (d,  $J^2 = 6.1$  Hz), 115.8, 127.1, 128.7, 129.0, 139.2, 148.3 (d,  $J^3 = 2.8$  Hz), 162.6 (d,  $J^2 = 6.3$  Hz). HRMS (ESI):  $m/z$   $[\text{M} + \text{Na}]^+$  calcd for  $\text{C}_{19}\text{H}_{28}\text{NO}_4\text{PNa}$ : 388.1654; found: 388.1665

##### 3-(5,5-dimethyl-2-oxido-1,3,2-dioxaphosphinan-2-yl)-1-tert-butyl-4-(1-phenylvinyl)azetidin-2-one (4b)

Purification by flash column chromatography, ( $\text{CH}_2\text{Cl}_2/\text{MeOH}$ , 30:1), yield 70%.  $^1\text{H}$  NMR (500 MHz,  $\text{CDCl}_3$ ):  $\delta$  (ppm) 0.97 (3 H, s), 1.20 (3 H, s), 1.36 (9 H, s), 3.40 (1 H, dd,  $J^{PH} = 13.6$  Hz,  $J^{HH} = 2.4$  Hz), 3.94-4.08 (2 H, m), 4.15 (1 H, dd,  $J^{PH} = 6.8$  Hz,  $J^{HH} = 10.7$  Hz), 4.36 (1 H, dd,  $J^{PH} = 6.8$  Hz,  $J^{HH} = 10.7$  Hz), 4.70 (1 H, dd,  $J^{PH} = 9.8$  Hz,  $J^{HH} = 2.4$  Hz), 5.56 (1 H, s), 5.61 (1 H, s), 7.30-7.38 (3 H, m), 7.53-7.55 (2 H, m).  $^{13}\text{C}$  NMR (125 MHz,  $\text{CDCl}_3$ ):  $\delta$  (ppm) 21.1, 22.1, 28.0, 32.9, 53.9 (d,  $J = 39.5$  Hz), 55.4 (d,  $J = 54.0$  Hz), 76.1 (d,  $J^2 = 6.6$  Hz),

77.8 (d,  $J^2 = 7.0$  Hz), 115.7, 126.8, 128.5, 128.8, 138.7, 147.7, 162.5. HRMS (ESI):  $m/z$  [M + Na]<sup>+</sup> calcd for C<sub>20</sub>H<sub>28</sub>NO<sub>4</sub>PNa: 400.1654; found: 400.1666.

**methyl 1-tert-butyl-2-oxo-4-(1-phenylvinyl)azetid-3-yl(phenyl)phosphinate (1:1 mixture of diastereoisomers) (4c)**

Purification by flash column chromatography, (AcOEt/Hex, 2:1), yield 34%. <sup>1</sup>H NMR (200 MHz, CDCl<sub>3</sub>): δ (ppm) 1.04 (4.5 H, s), 1.34 (4.5 H, s), 3.37 (0.5 H, dd,  $J^{PH} = 7.0$  Hz,  $J^{HH} = 2.5$  Hz), 3.53 (0.5 H, dd,  $J^{PH} = 14.9$  Hz,  $J^{HH} = 2.4$  Hz), 3.69 (1.5 H, d,  $J^{PH} = 11.2$  Hz), 3.74 (1.5 H, d,  $J^{PH} = 11.3$  Hz), 4.45 (0.5 H, dd,  $J^{PH} = 9.1$  Hz,  $J^{HH} = 2.4$  Hz), 4.72 (0.5 H, dd,  $J^{PH} = 8.8$  Hz,  $J^{HH} = 2.5$  Hz), 5.42 (0.5 H, s), 5.51 (1 H, s), 5.56 (0.5 H, s), 7.24-7.59 (8 H, m), 7.81-7.93 (3 H, m). <sup>13</sup>C NMR (50 MHz, CDCl<sub>3</sub>): δ (ppm) 28.09, 28.31, 52.1 (d,  $J = 6.6$  Hz), 52.4 (d,  $J = 6.2$  Hz), 54.0 (d,  $J = 11.0$  Hz), 55.6, 55.7 (d,  $J = 13.8$  Hz), 57.2 (d,  $J = 4.7$  Hz), 59.0 (d,  $J = 4.3$  Hz), 77.3, 77.7, 116.1, 116.2, 127.0, 128.4 (d,  $J = 47.0$  Hz), 128.6, 128.7, 129.0 (d,  $J = 5.7$  Hz), 129.2 (d,  $J = 5.1$  Hz), 132.4, 132.6, 133.3, 133.4, 133.5, 133.6, 139.0, 139.4, 148.0 (d,  $J = 2.6$  Hz), 148.2 (d,  $J = 2.6$  Hz), 162.6, 162.9. HRMS (ESI):  $m/z$  [M + Na]<sup>+</sup> calcd for C<sub>22</sub>H<sub>26</sub>NO<sub>3</sub>PNa: 406.1548; found: 406.1552.

**O,O-diethyl 1-tert-butyl-2-oxo-4-(1-phenylvinyl)azetid-3-ylphosphonothioate (4f)**

Purification by flash column chromatography, (EtOAc/hexanes, 1:8), yield 15%. <sup>1</sup>H NMR (200 MHz, CDCl<sub>3</sub>): δ (ppm) 1.16 (3 H, t,  $J = 6.8$  Hz), 1.29 (3 H, t,  $J = 6.9$  Hz), 1.38 (9 H, s), 3.39 (1 H, dd,  $J^{PH} = 13.8$  Hz,  $J^{HH} = 2.5$  Hz), 3.97-4.26 (4 H, m), 4.68 (1 H, dd,  $J^{PH} = 10.9$  Hz,  $J^{HH} = 2.5$  Hz), 5.50 (1 H, s), 5.58 (1 H, s), 7.26-7.44 (5 H, m). <sup>13</sup>C NMR (50 MHz, CDCl<sub>3</sub>): δ (ppm) 16.4 (d,  $J^2 = 7.3$  Hz), 16.6 (d,  $J^2 = 5.9$  Hz), 28.5, 55.5, 55.8 (d,  $J^2 = 2.2$  Hz), 61.2 (d,  $J^1 = 110.5$  Hz), 62.9 (d,  $J^2 = 6.8$  Hz), 64.1 (d,  $J^2 = 6.1$  Hz), 116.1, 127.2, 128.6, 129.0, 139.3, 148.2 (d,  $J^3 = 2.8$  Hz), 162.4. <sup>31</sup>P NMR (200 MHz, CDCl<sub>3</sub>): δ 87.6. HRMS (ESI):  $m/z$  [M + Na]<sup>+</sup> calcd for C<sub>19</sub>H<sub>28</sub>NO<sub>3</sub>PSNa: 404.1425; found: 404.1428.

**1-[3-(diethoxyphosphorothioyl)-1-tert-butyl-4-oxoazetid-2-yl]-1-phenylethyl acetate (1:2 mixture of diastereoisomers) (5f)**

Purification by flash column chromatography, (EtOAc/hexanes, 1:8), yield 15%. <sup>1</sup>H NMR (200 MHz, CDCl<sub>3</sub>): δ (ppm) 0.94 (2 H, t,  $J = 7.0$  Hz), 1.21 (2 H, t,  $J = 7.1$  Hz), 1.26-1.34 (2 H, m), 1.35 (3 H, s), 1.51 (6 H, s), 1.93 (2 H, s), 1.99 (1 H, s), 2.05 (1 H, s), 2.07 (2 H, s), 3.00 (0.66 H, dd,  $J^{PH} = 16.2$  Hz,  $J^{HH} = 2.2$  Hz), 3.14 (0.33 H, dd,  $J^{PH} = 14.2$  Hz,  $J^{HH} = 2.2$  Hz),

3.38-3.74 (1.33 H, m), 3.99-4.30 (3.66 H, m), 7.28-7.35 (5 H, m).  $^{13}\text{C}$  NMR (125 MHz,  $\text{CDCl}_3$ ):  $\delta$  (ppm) 16.1 (d,  $J^2 = 6.5$  Hz), 16.2 (d,  $J^2 = 7.0$  Hz), 16.3 (d,  $J^2 = 7.8$  Hz), 16.4 (d,  $J^2 = 7.3$  Hz), 17.27, 20.8 (min), 22.4 (d,  $J = 6.6$  Hz, maj), 28.9, 54.7 (d,  $J^1 = 112.7$  Hz, maj), 55.2 (d,  $J^1 = 135.5$  Hz, min), 55.8 (d,  $J^2 = 6.8$  Hz, min), 61.8 (maj), 62.1 (d,  $J^2 = 7.5$  Hz, maj), 62.7 (d,  $J^2 = 6.6$  Hz, min), 64.2 (d,  $J^2 = 6.1$  Hz, min), 64.4 (d,  $J^2 = 6.1$  Hz, maj), 83.2 (d,  $J^3 = 4.3$  Hz, min), 84.0 (d,  $J^3 = 4.8$  Hz, maj), 125.4 (maj), 126.6 (min), 128.2 (maj), 128.4 (min), 128.5 (min), 128.9 (maj), 139.3 (min), 140.8 (maj), 161.7 (d,  $J^2 = 3.5$  Hz, maj), 162.0 (d,  $J^2 = 3.3$  Hz, min), 168.5 (maj), 168.8 (min).  $^{31}\text{P}$  NMR (200 MHz,  $\text{CDCl}_3$ ):  $\delta$  89.4, 89.3. HRMS (ESI):  $m/z$   $[\text{M} + \text{Na}]^+$  calcd for  $\text{C}_{21}\text{H}_{32}\text{NO}_5\text{PSNa}$ : 464.1637; found: 464.1616.

#### 5. (1-tert-Butyl-7-methylene-2-oxo-1,2,7,7a-tetrahydro-indeno[2,1-b]azet-2a-yl)-phosphonic acid diethyl ester (6a)

To a stirred mixture of 1-tert-butyl-2-oxo-4-(1-phenylvinyl)azetid-3-ylphosphonate (**3a**) (0.5 mmol, 0.182 g) in acetic acid (10 mL) at reflux, was added  $\text{Mn}(\text{OAc})_3 \cdot 2\text{H}_2\text{O}$  (1 mmol, 0.267 g). After 1 h additional portion of  $\text{Mn}(\text{OAc})_3 \cdot 2\text{H}_2\text{O}$  (1 mmol, 0.267 g) was added. Reaction mixture was cooled and poured into 50 mL of ice water, and extracted with  $\text{CH}_2\text{Cl}_2$  (5x20 mL). Organic layer was washed with aqueous 5 %  $\text{NaHCO}_3$  (3x10 mL), dried with  $\text{MgSO}_4$  and concentrated. The residue was a subject to purification as specified below. Purification by flash column chromatography, (EtOAc/hexanes, 1:2), gave 0.023 g of **5a**; yield 13%.  $^1\text{H}$  NMR (200 MHz,  $\text{CDCl}_3$ ):  $\delta$  (ppm) 1.27 (6 H, dt,  $J^{PH} = 2.5$  Hz,  $J^{HH} = 7.3$  Hz), 1.37 (9 H, s), 4.11-4.19 (4 H, m), 4.86 (1 H, d,  $J^{PH} = 6.3$  Hz), 5.47 (1 H, s), 5.86 (1 H, s), 7.31-7.36 (2 H, m), 7.52-7.54 (1 H, m), 7.66-7.69 (1 H, m). HRMS (ESI):  $m/z$   $[\text{M} + \text{Na}]^+$  calcd for  $\text{C}_{19}\text{H}_{26}\text{NO}_4\text{P}$ : 386.1496; found: 386.1527.

PP50 CDCL3 27.10.11

**3a**

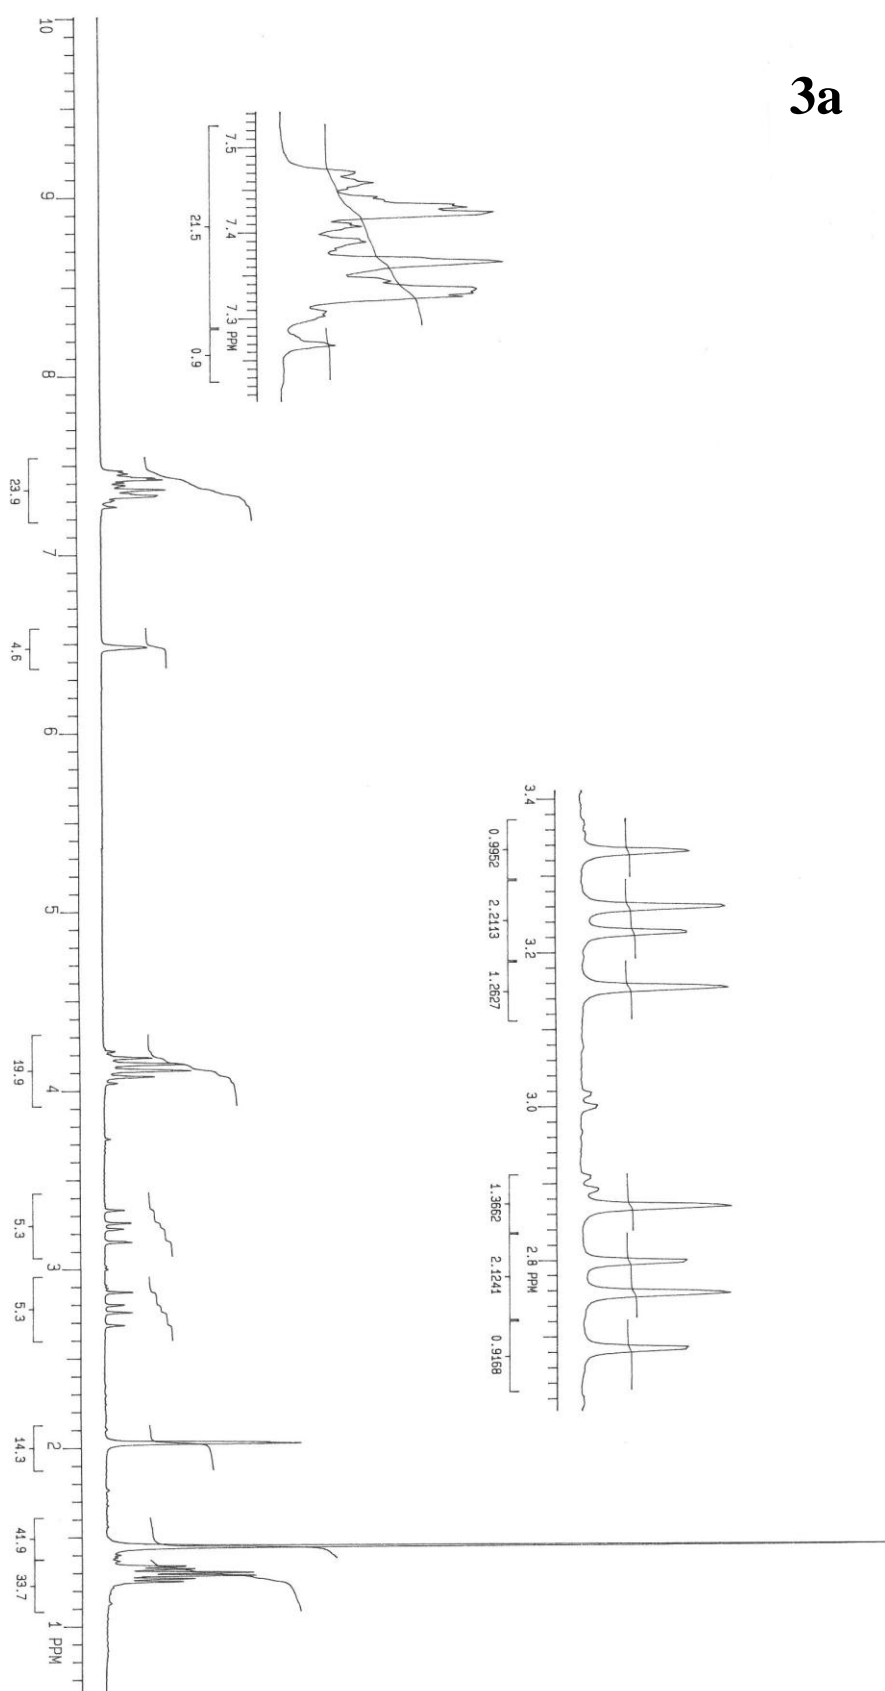

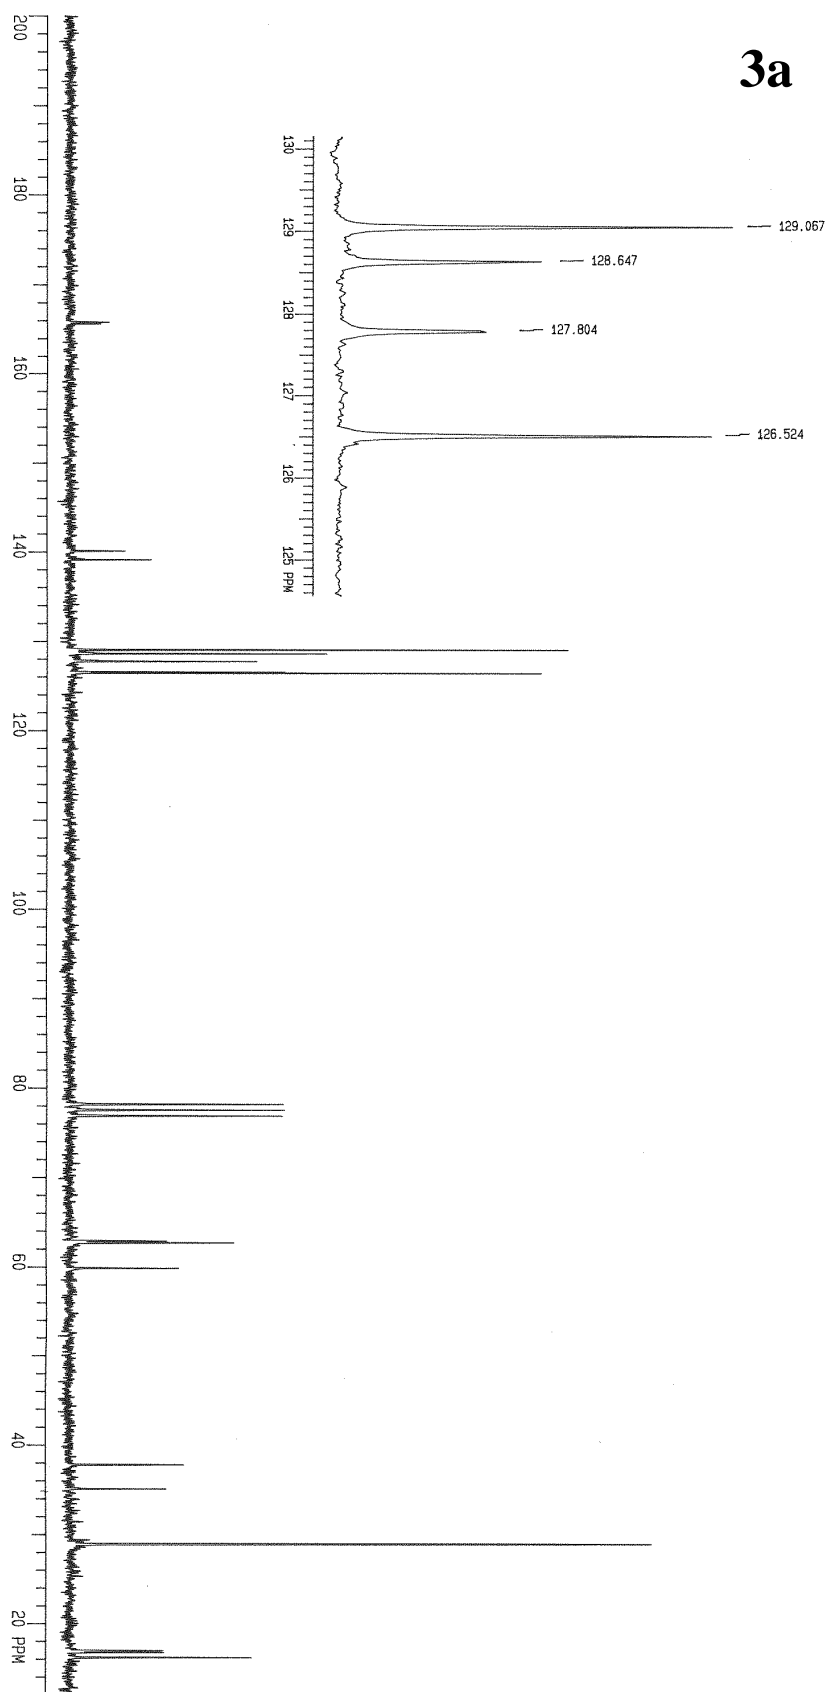



001218H

**3b**

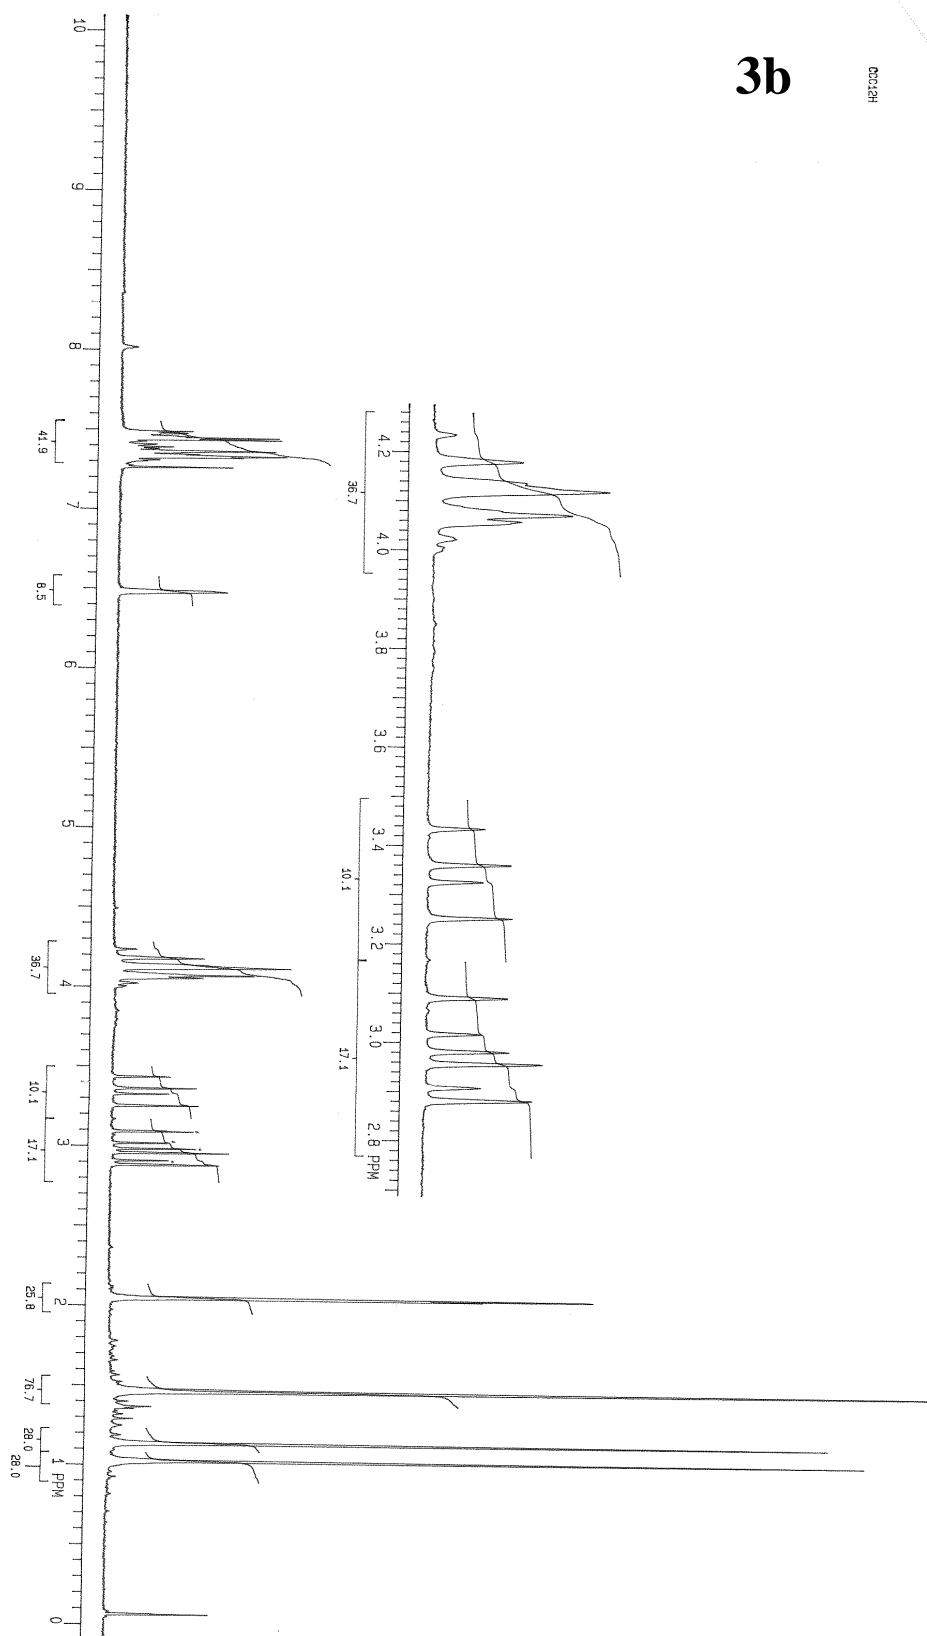

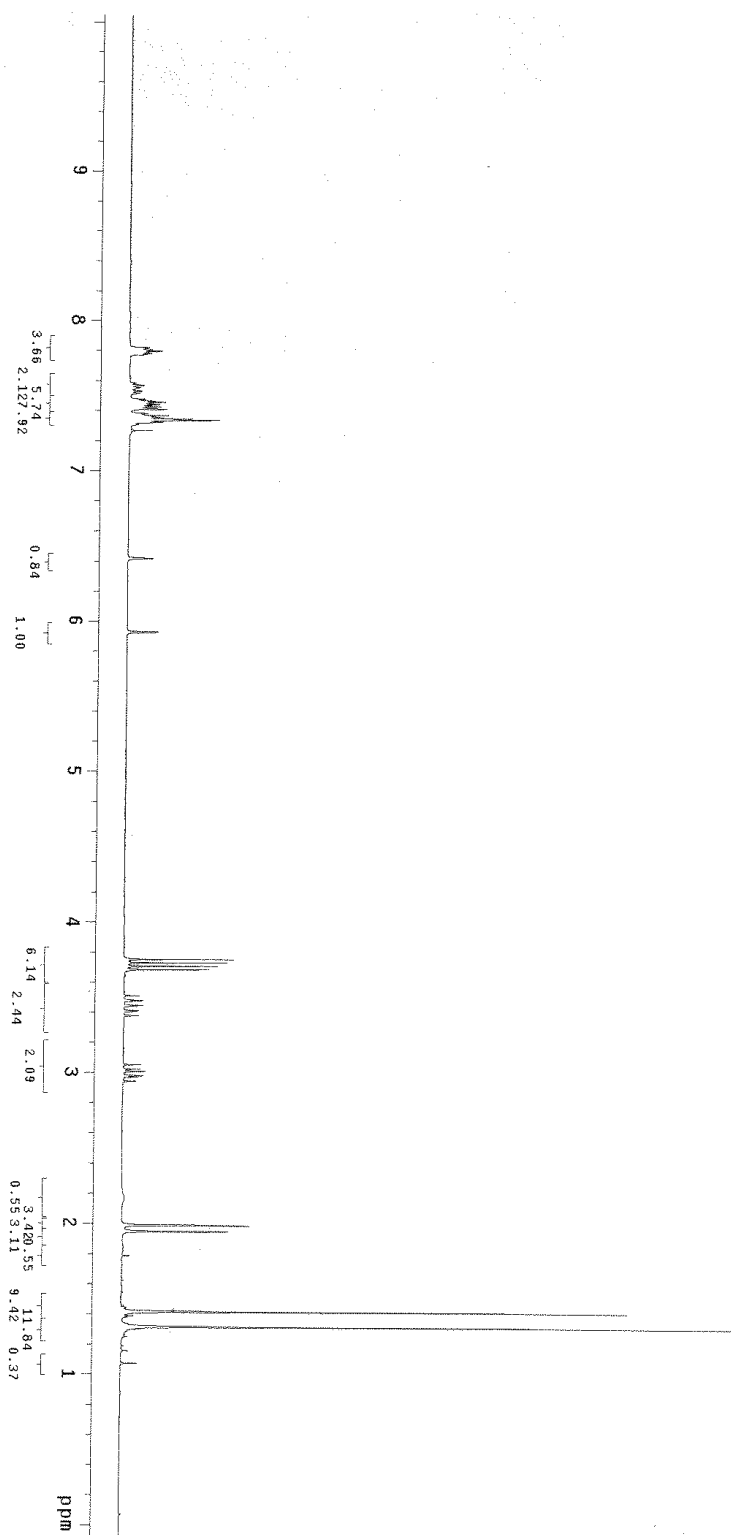

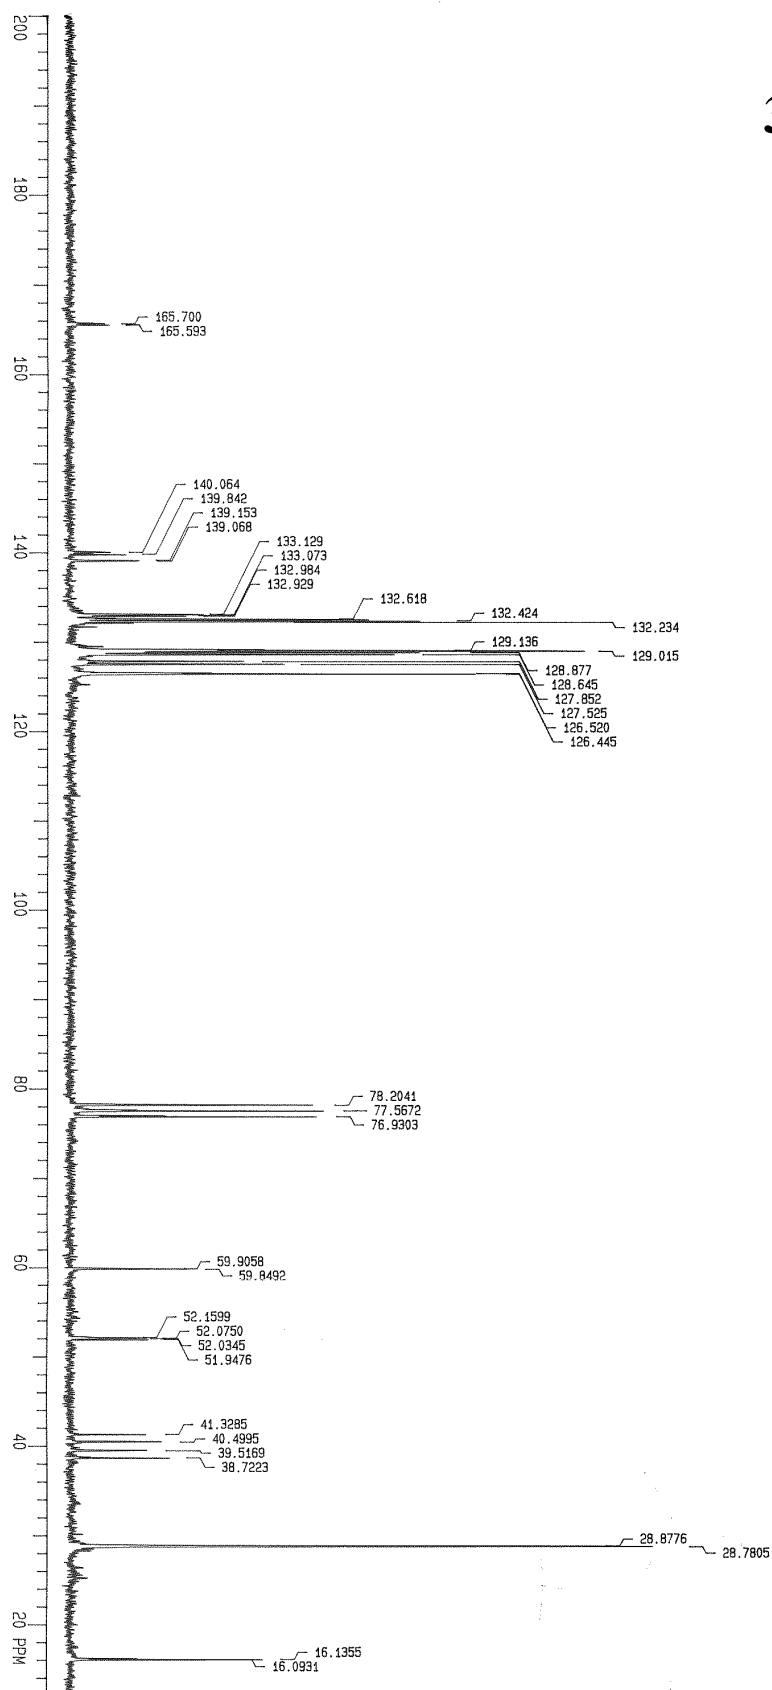

PP1265  
C00163  
08.12.2013

**3e**

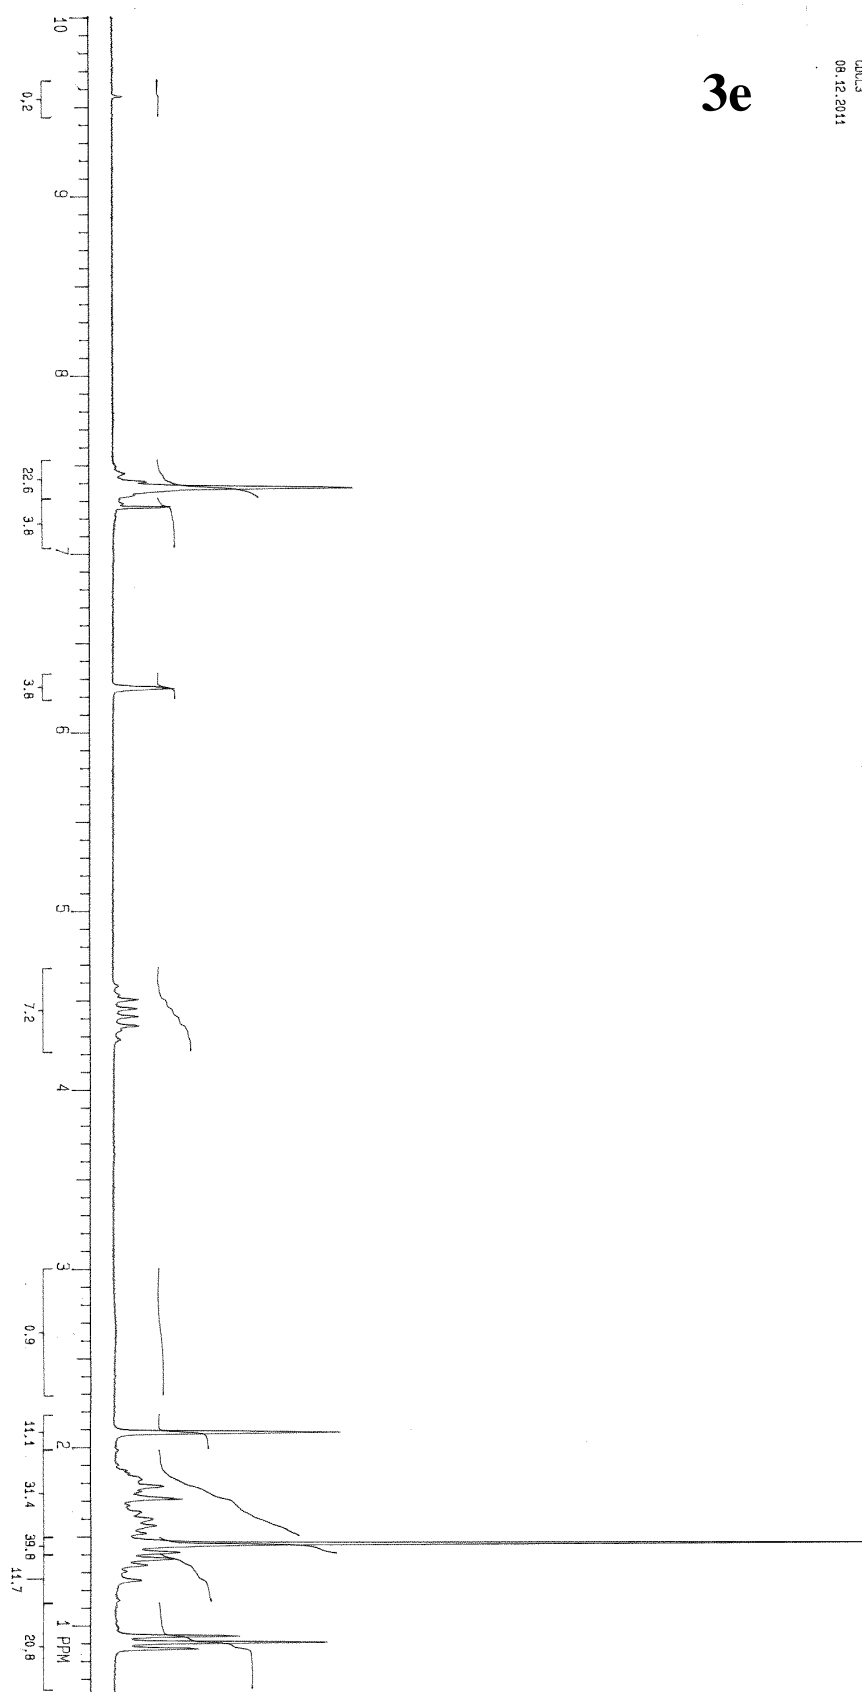

**3f**

pp33\_1H  
CDCl<sub>3</sub>  
11.09.2012

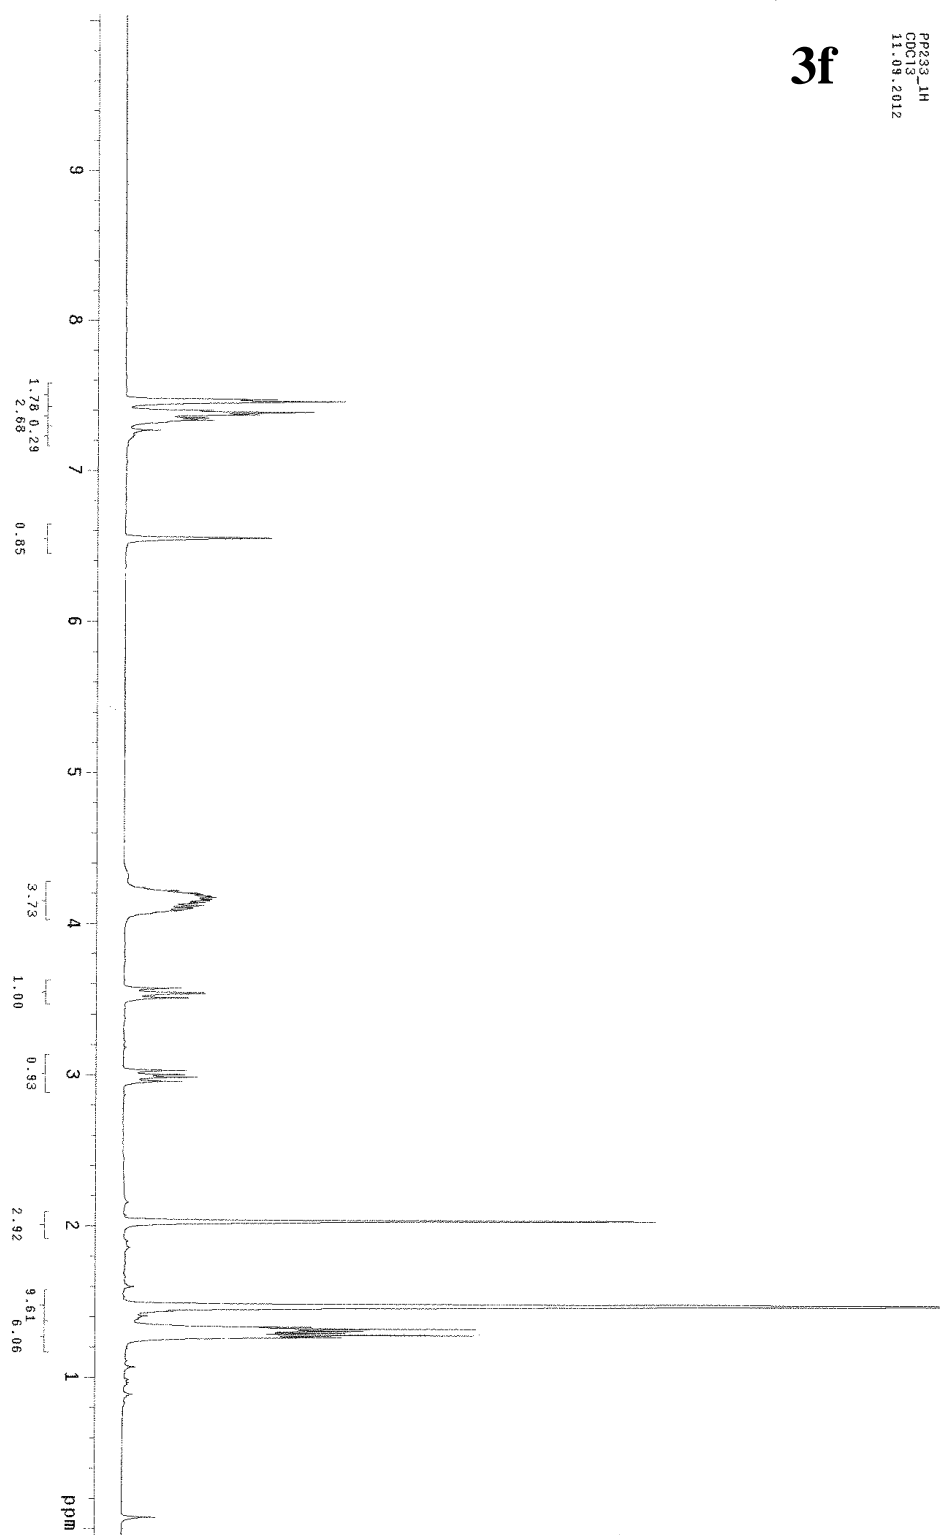

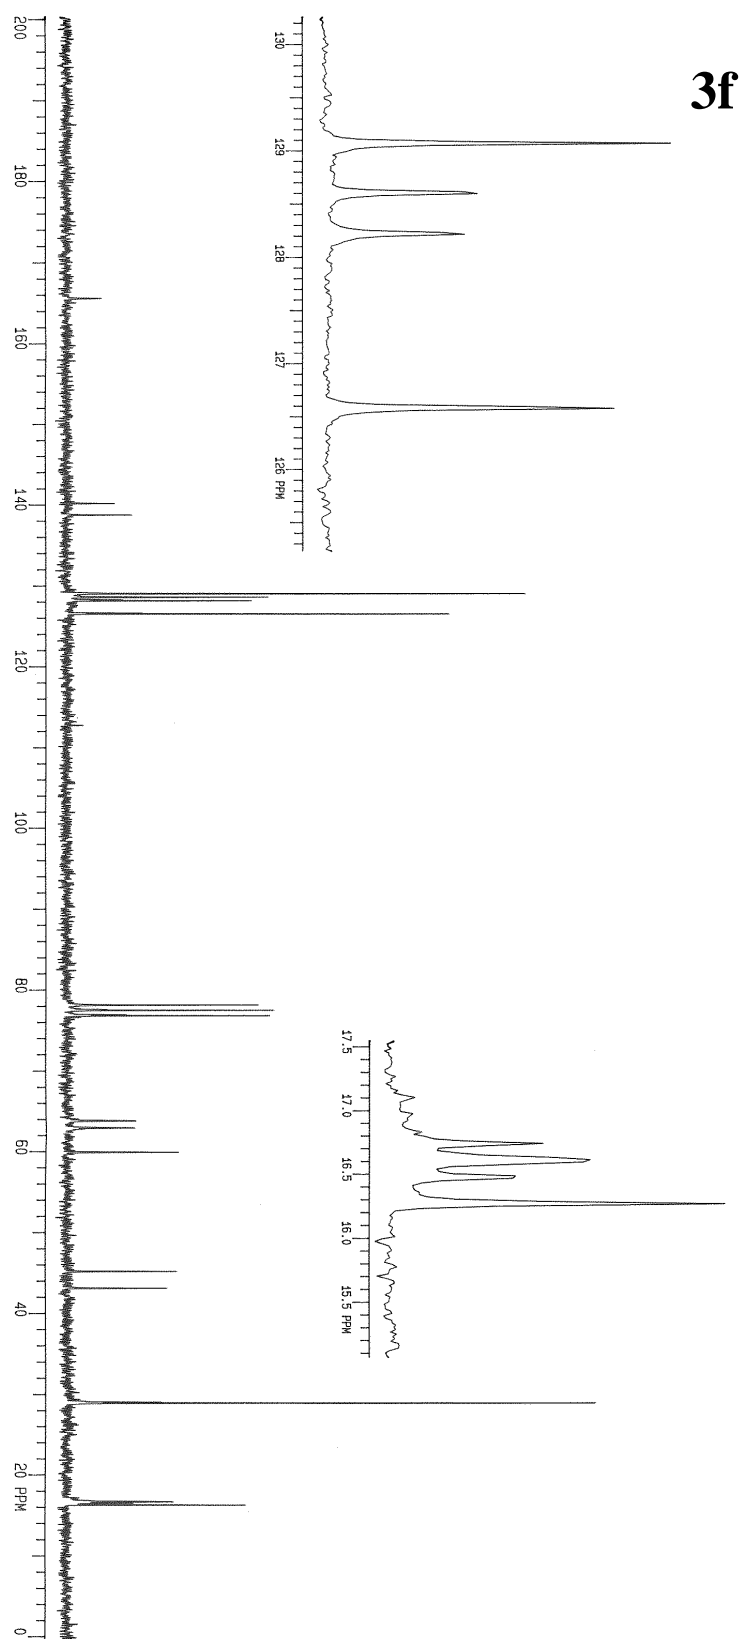

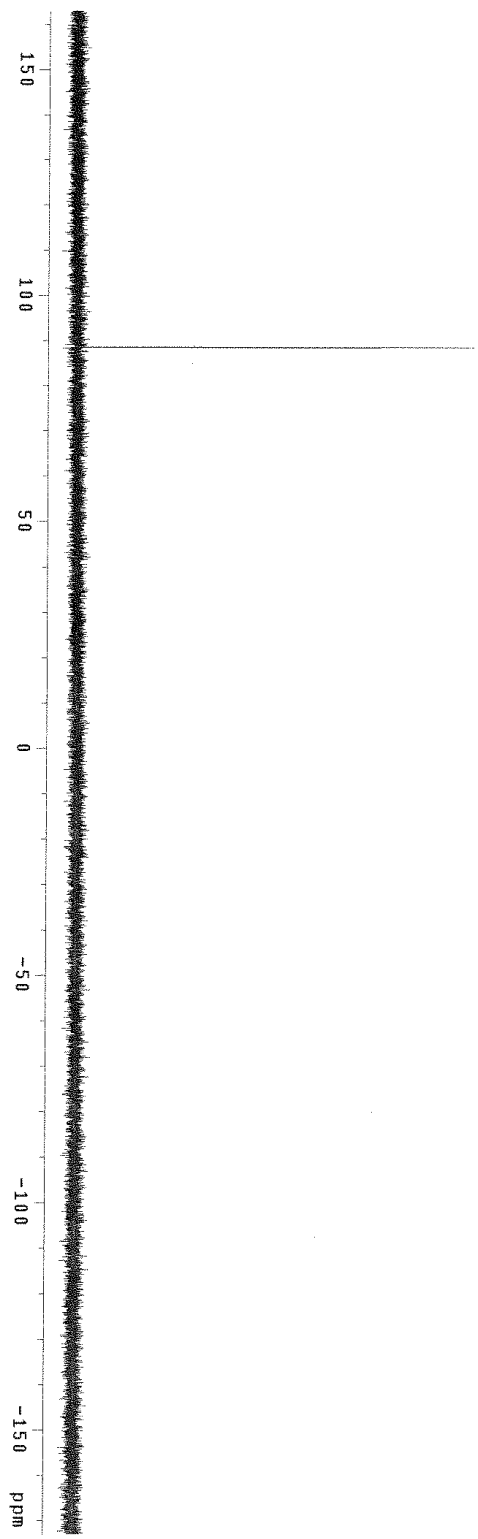

**3f**

PP233  
FPC3  
11.03.2012

| INDEX | FREQUENCY | PPM    | HEIGHT |
|-------|-----------|--------|--------|
| 1     | 17910.500 | 88.521 | 1.5    |





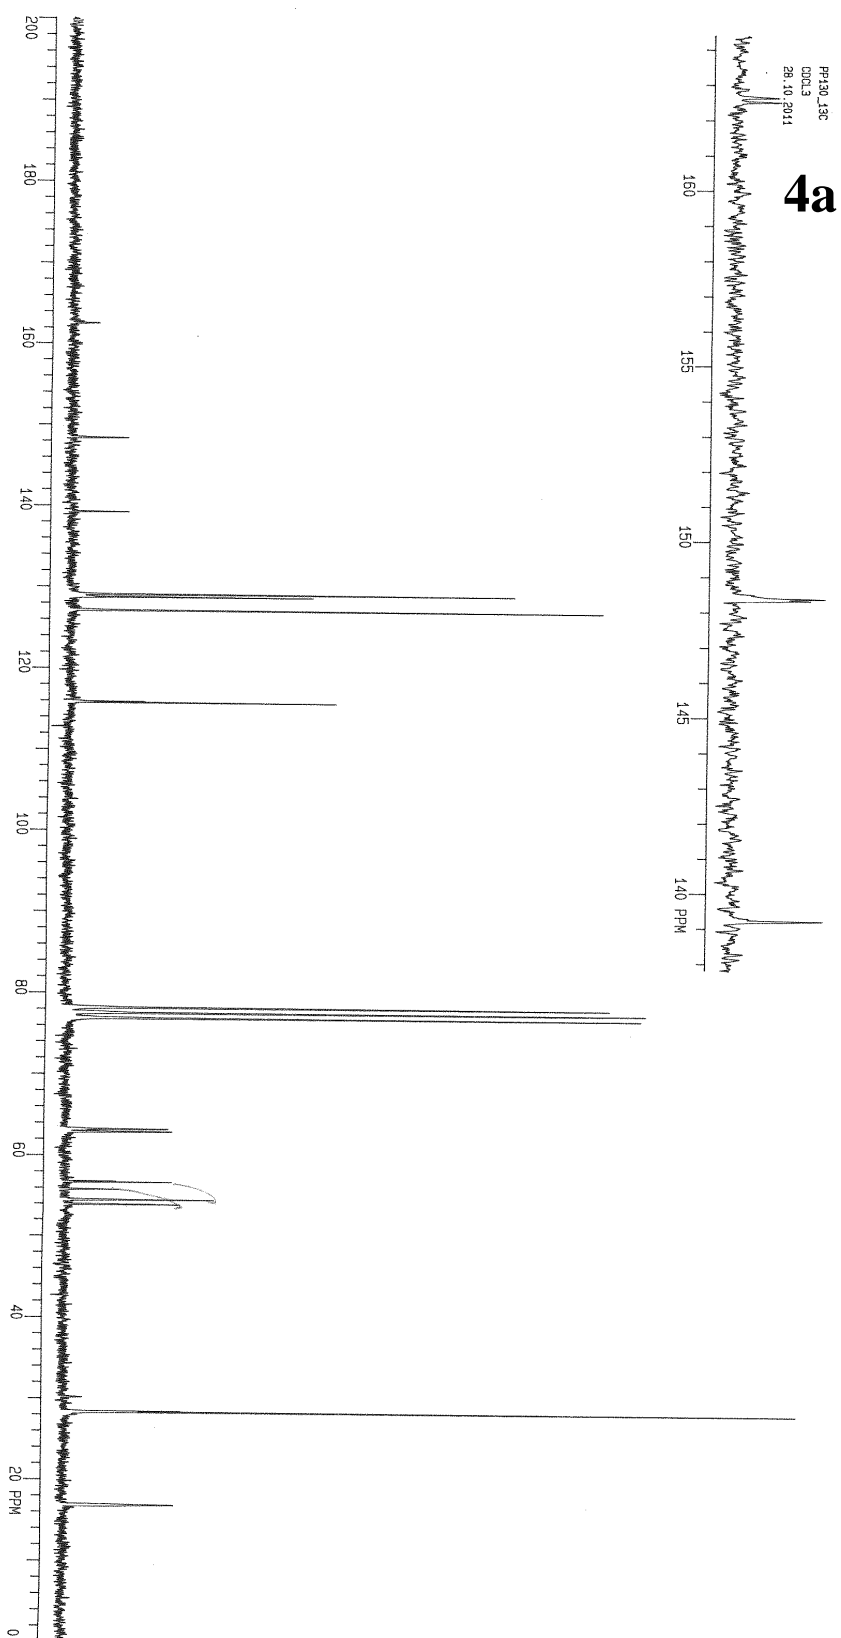



220  
200  
180  
160  
140  
120  
100  
80  
60  
40  
20  
ppm

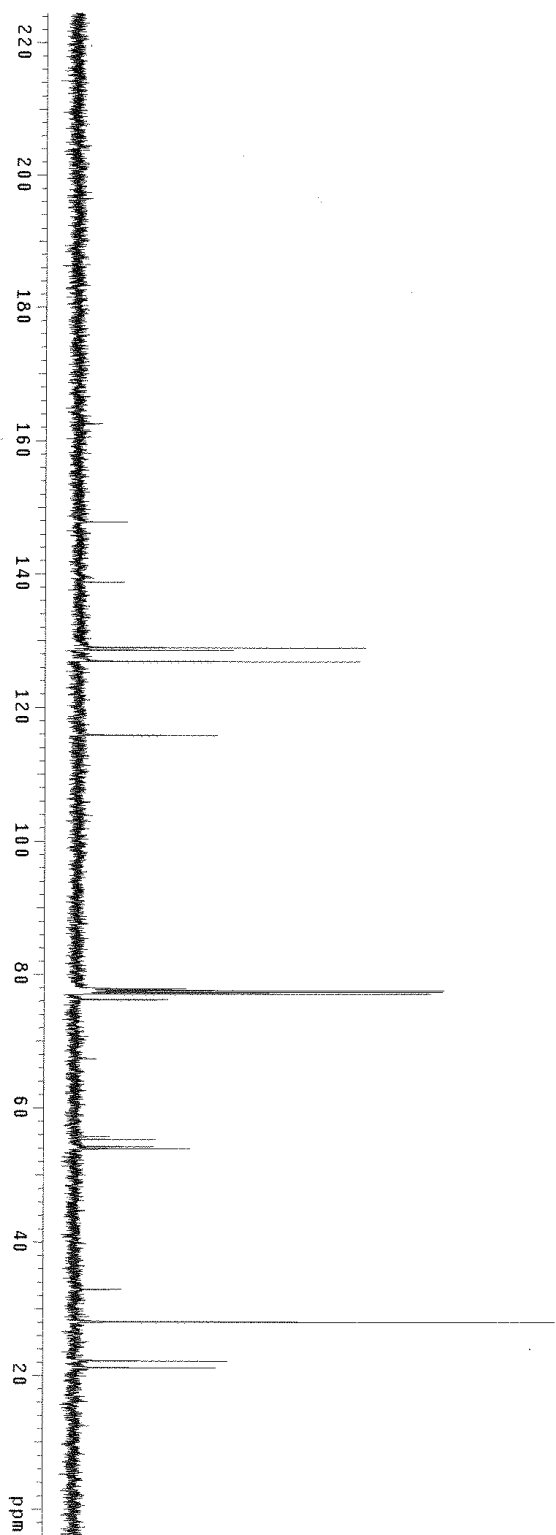

**4b**

PP209\_C13  
05/04/2012

216-CO013-28\_05\_12

4c

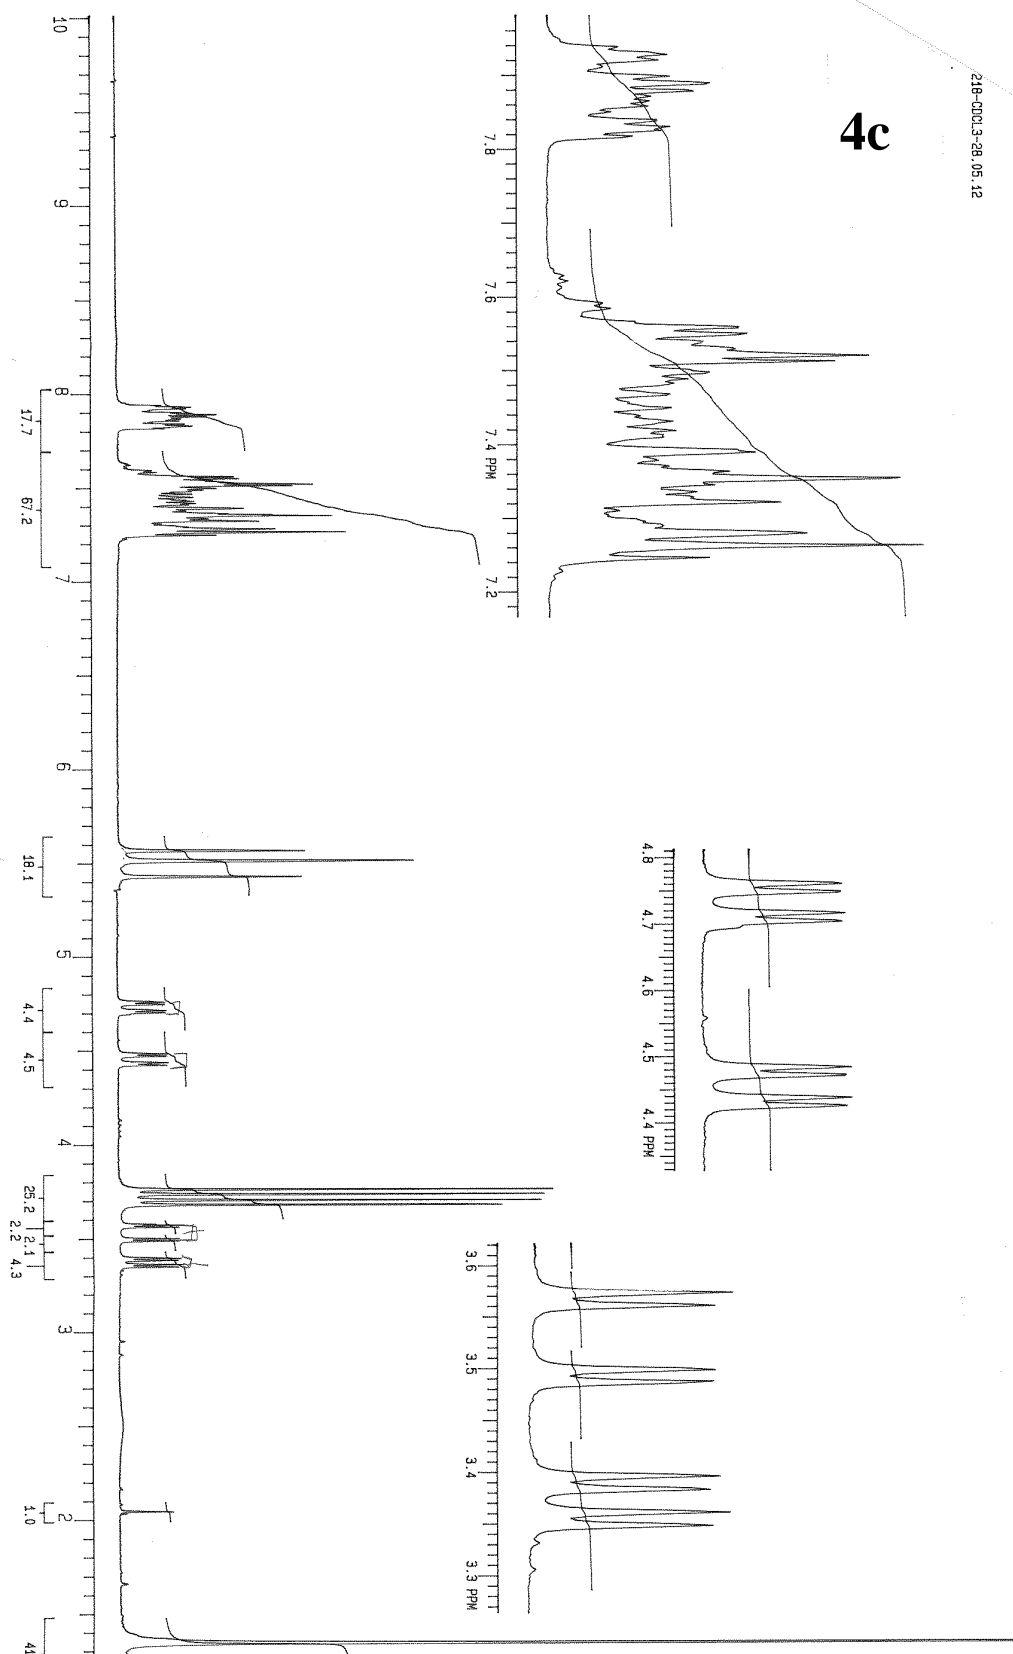

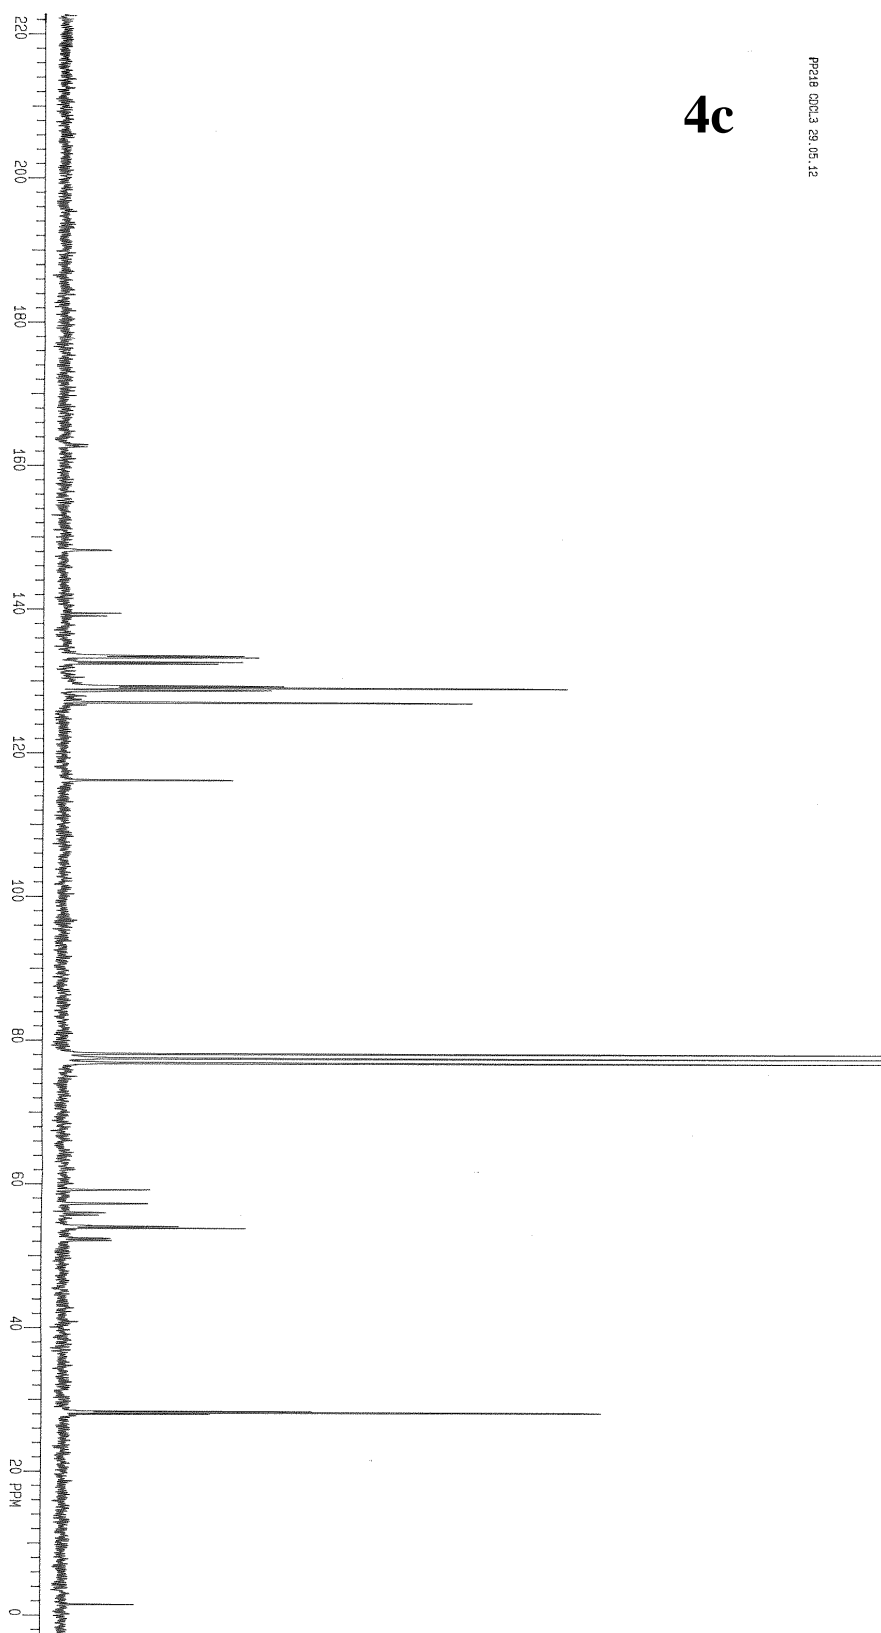

PR237 C0013 12.09.12

4f

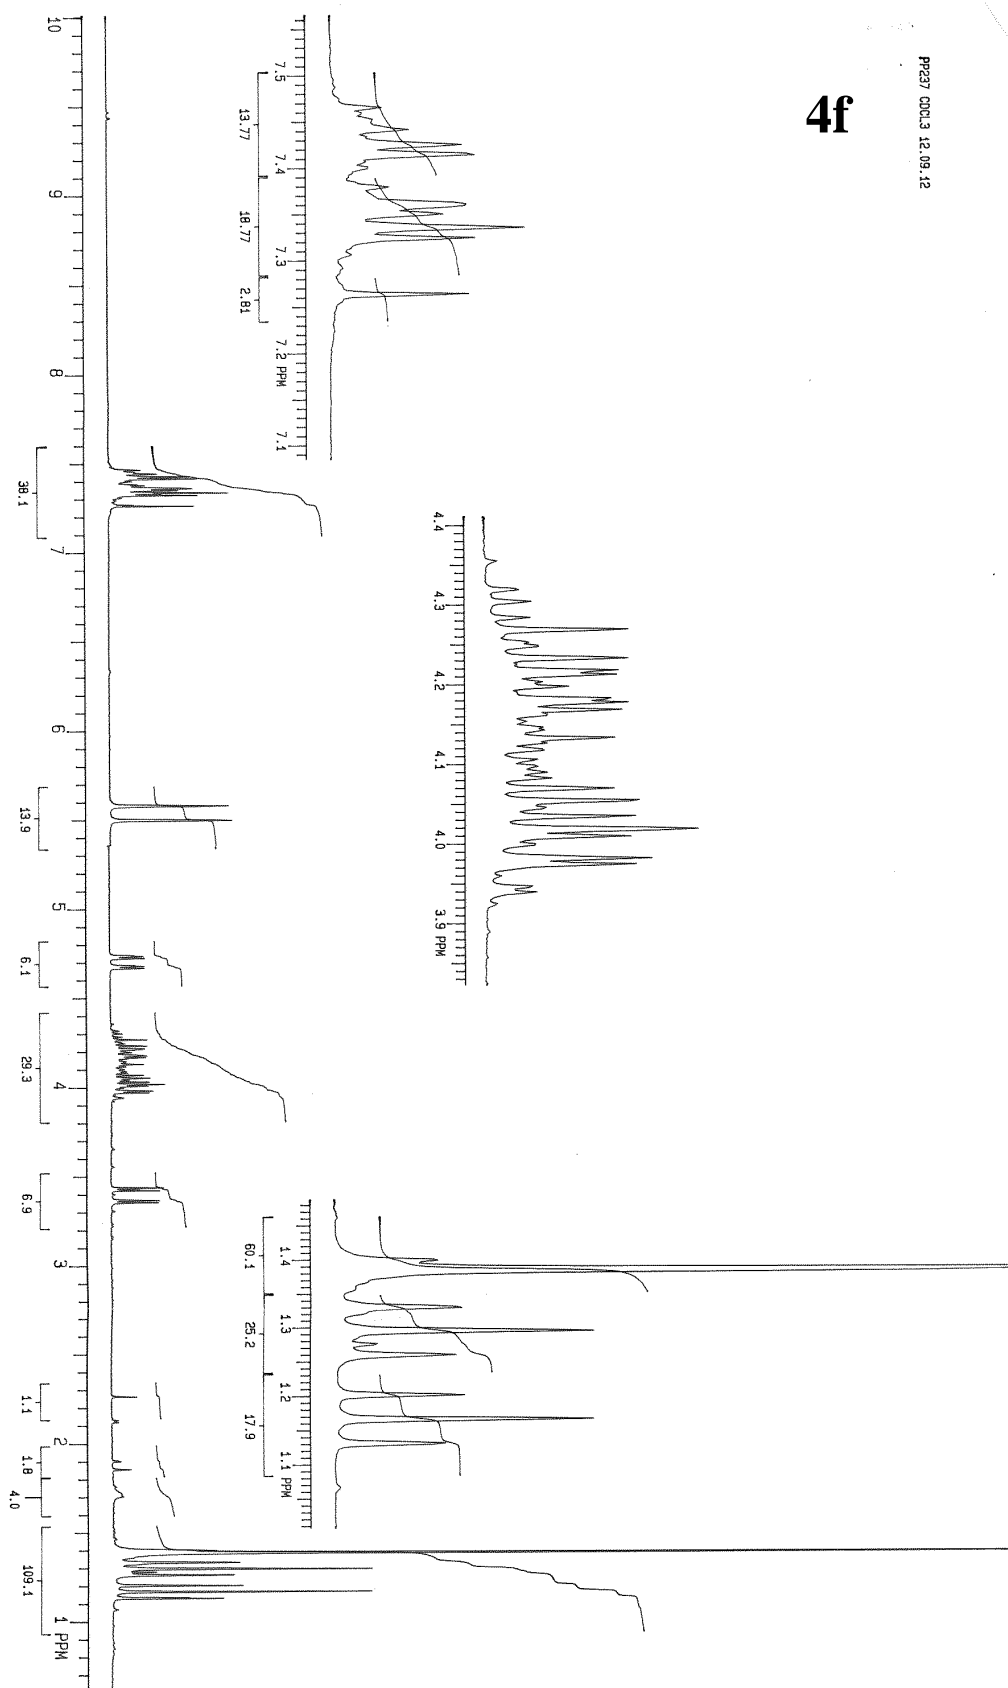

**4f**

pp237\_F31  
00013  
13.09.2012

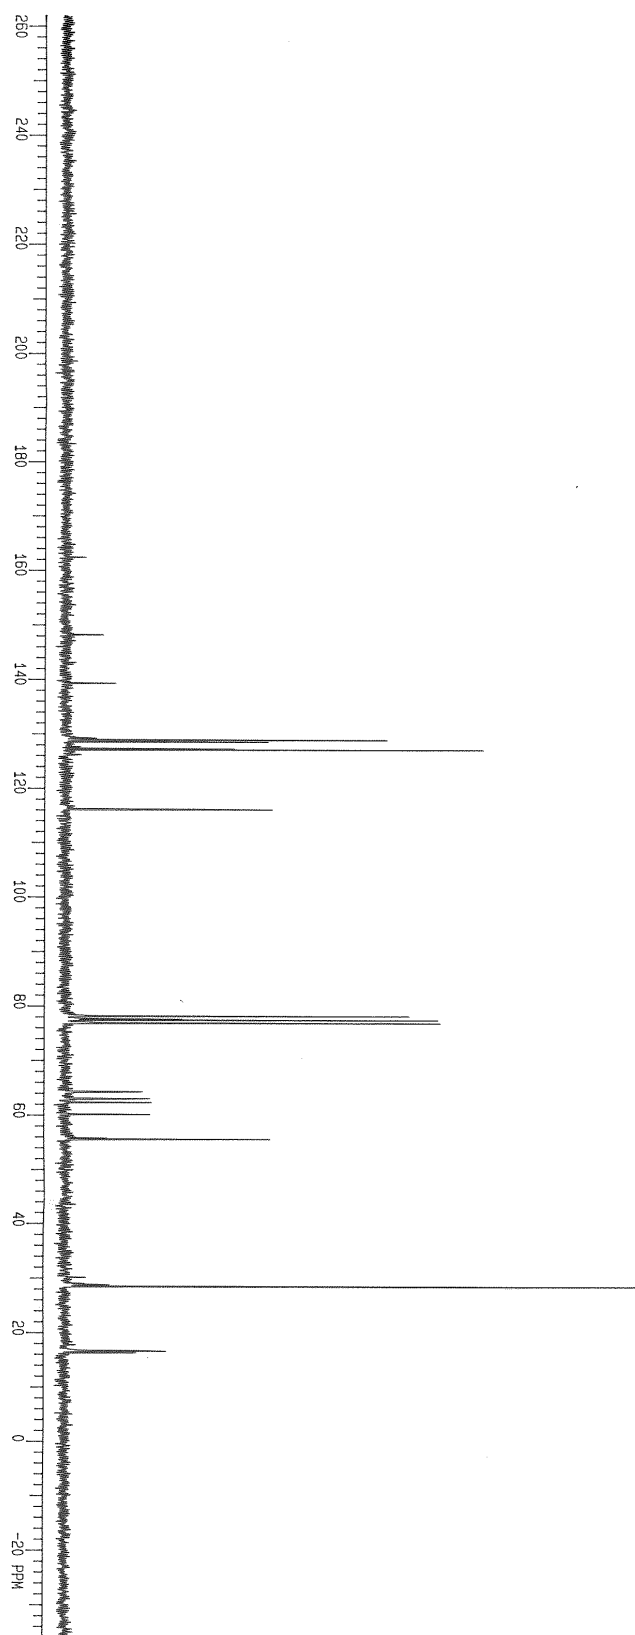

PP237\_P31  
09/13  
13.03.2012

**4f**

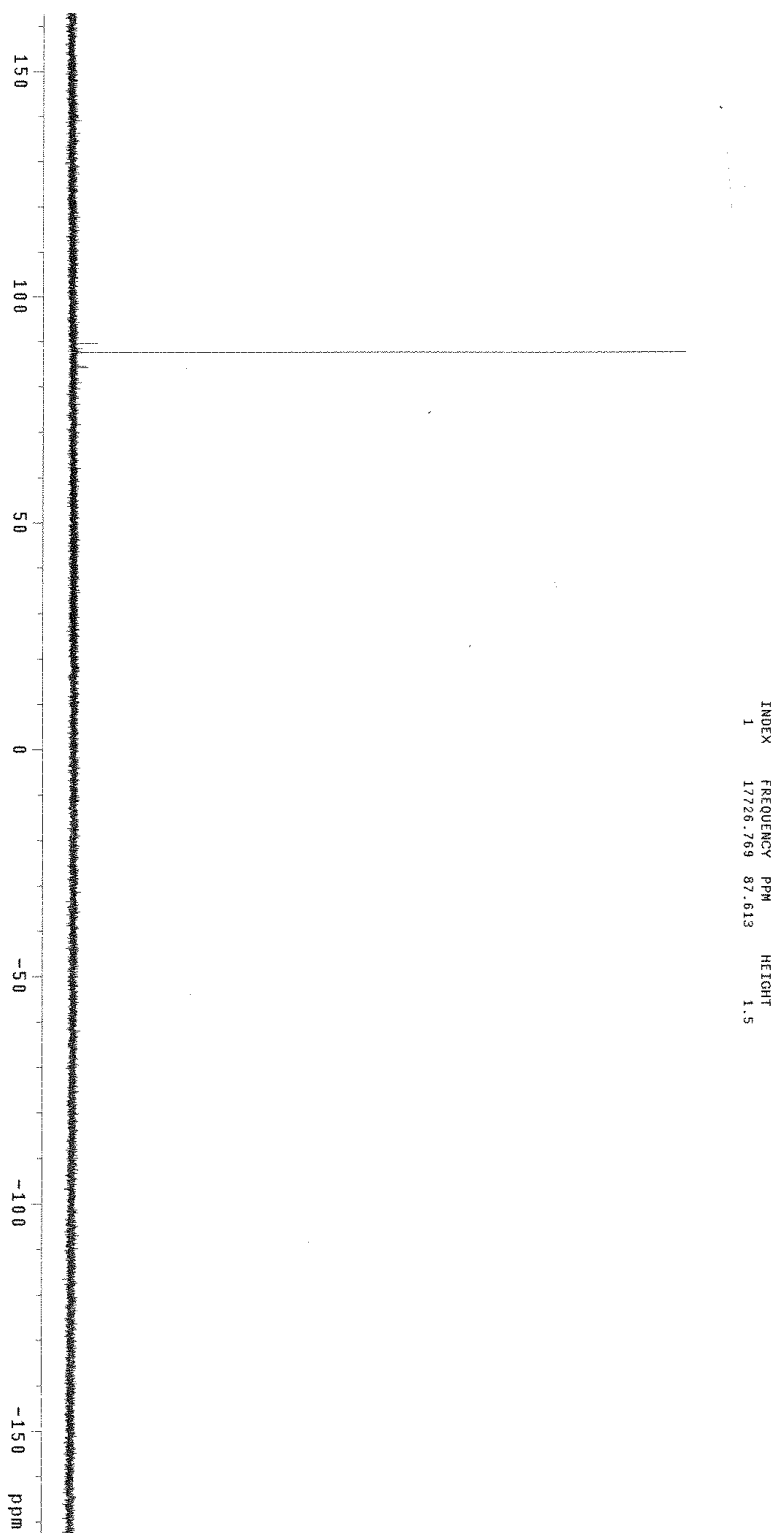



5f

PP23708

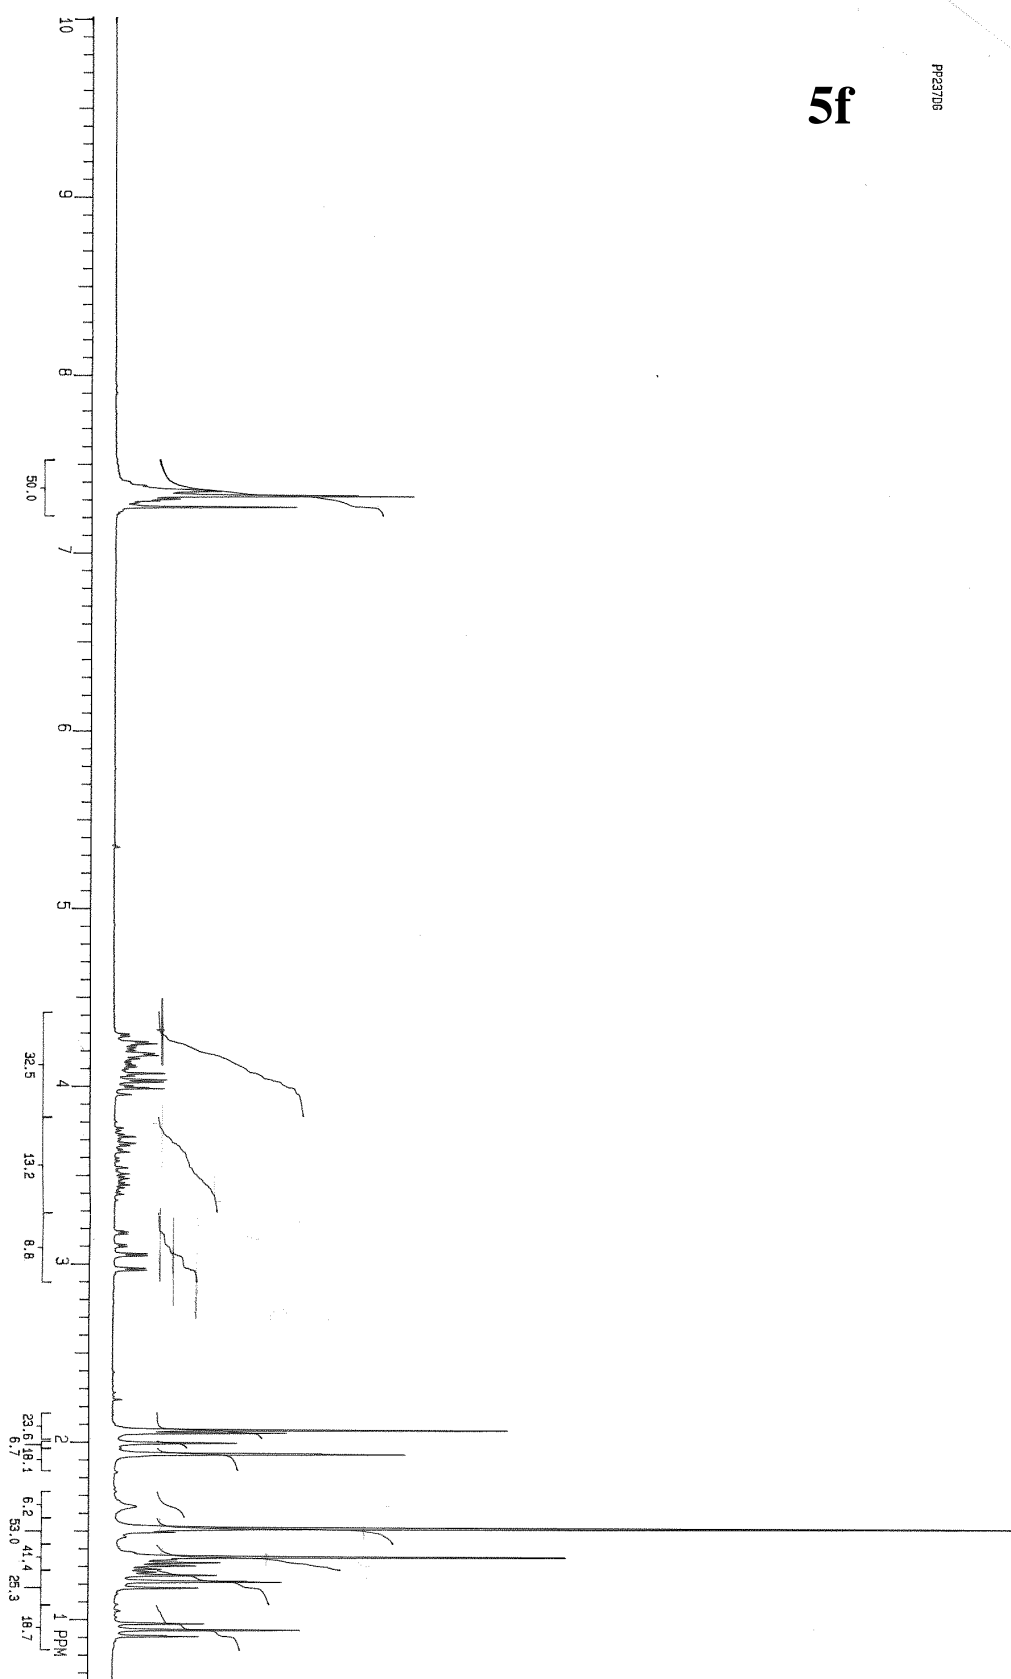

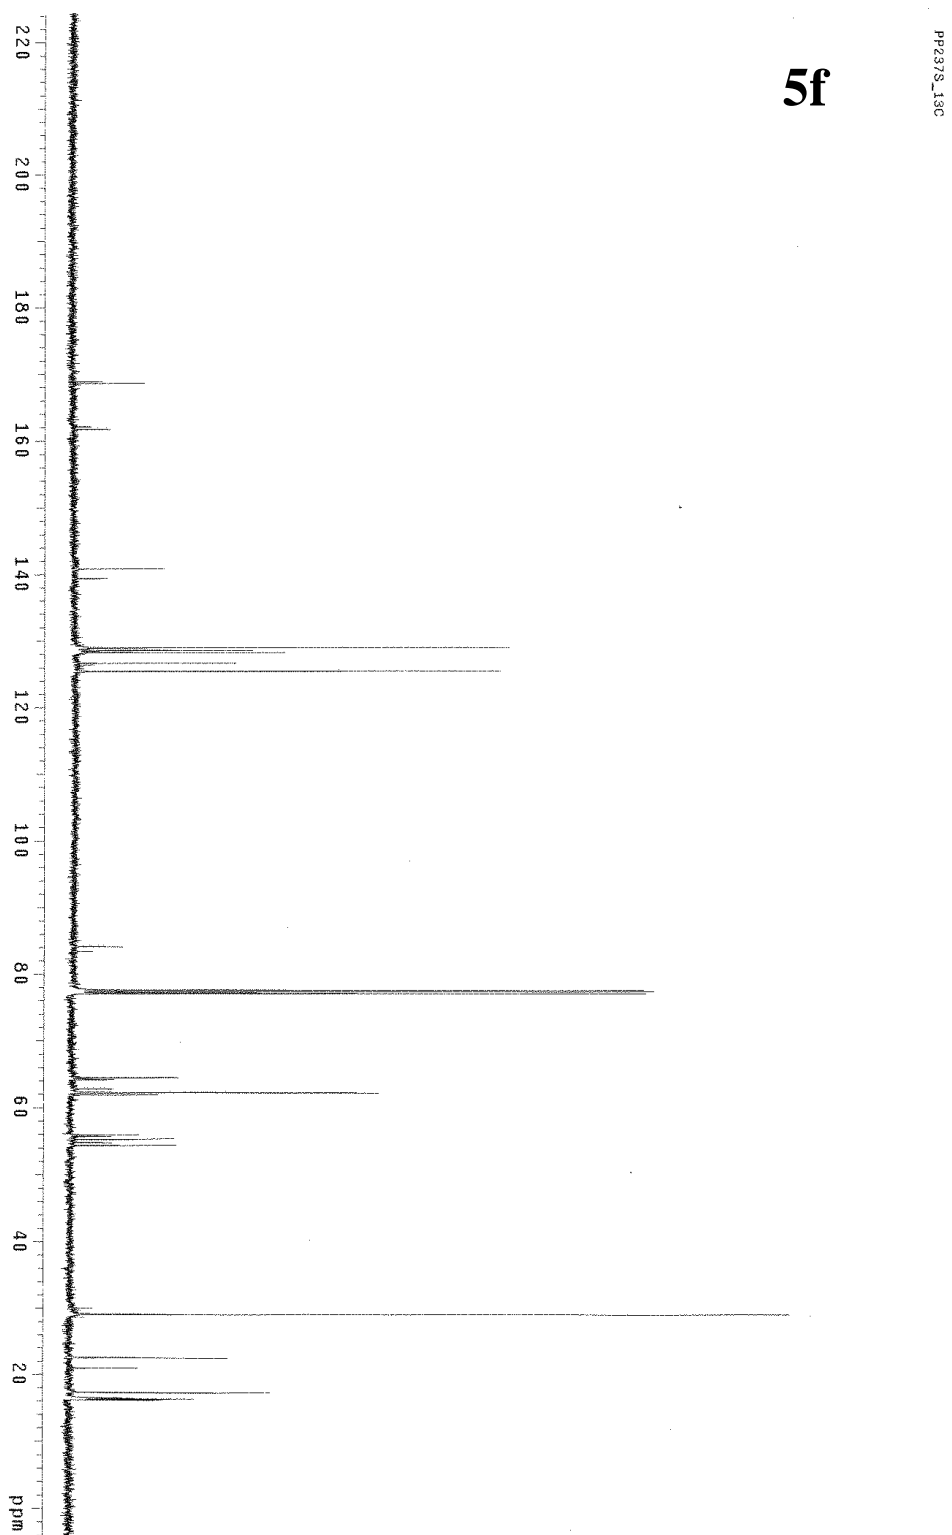

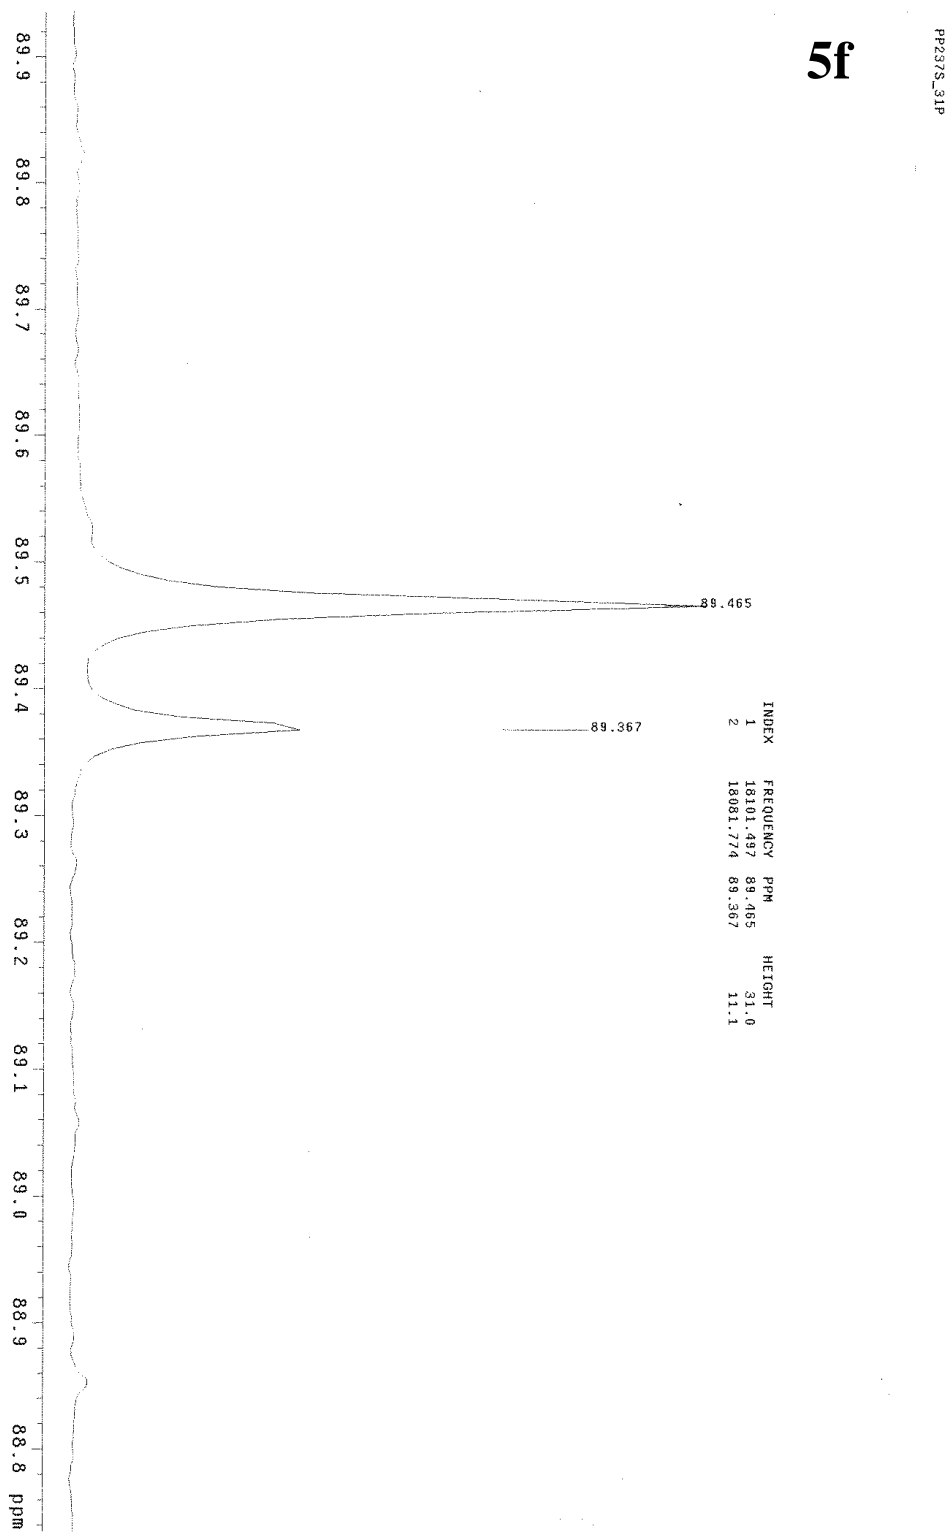

6a

PP1620-CHCl3-05\_04\_12

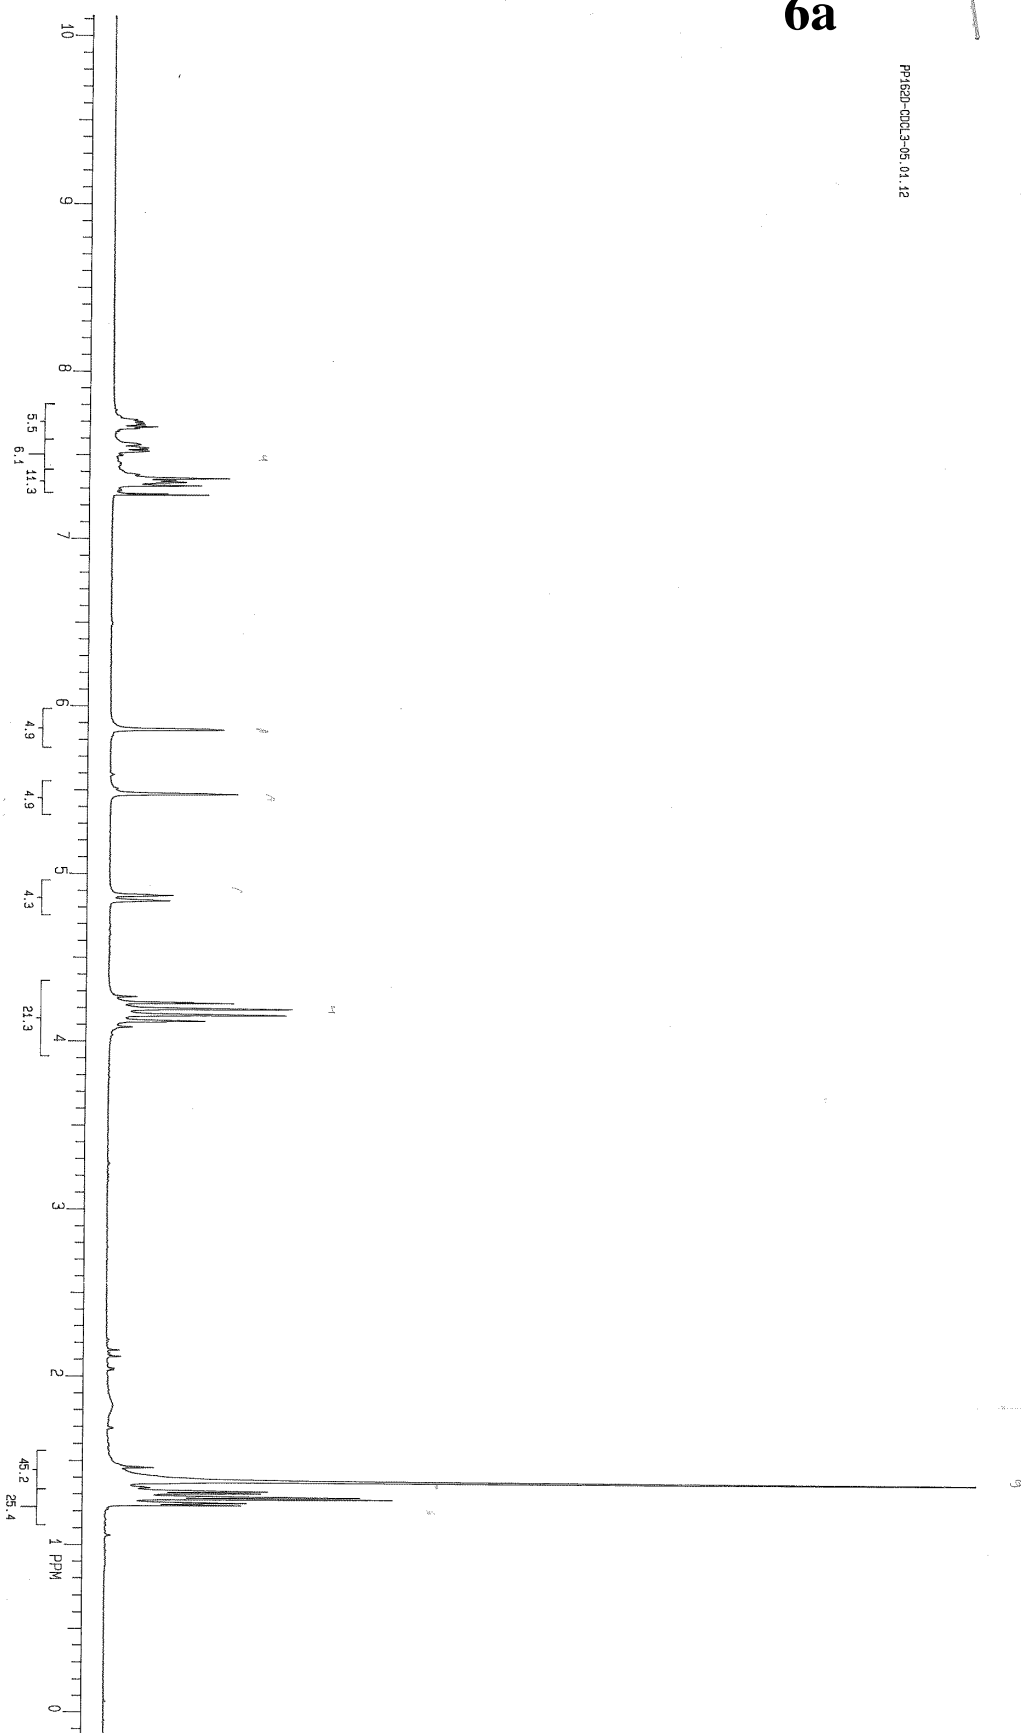

Supplement: c3nj00192j.pdf [file c3nj00192j.pdf]
